# Supplementary material for: Ocean Deoxygenation and Copepods: Coping with Oxygen Minimum Zone Variability
Source: Copernicus journal article supplement (doi:10.5194/bg-2019-394), 2019-10-28
Supplement: Supplementary file 1 [file bg-2019-394-supplement.pdf]

Wishner Supplementary Table 1

| Tow # | Net ID | Start Depth<br>m | End Depth<br>m | Vol. Filtr.<br>m <sup>3</sup> | Dis pal<br>Adults | Dis pal<br>C5 | Eua mag<br>Adults | Eua nod<br>Adults | Euc cal<br>Adults | Euc cal<br>C4 M | Euc cal<br>C5 M | Euc cal<br>C5 F | Euc ine<br>Adults | Euc ine<br>C1 | Euc ine<br>C2 |
|-------|--------|------------------|----------------|-------------------------------|-------------------|---------------|-------------------|-------------------|-------------------|-----------------|-----------------|-----------------|-------------------|---------------|---------------|
| 607   | 6071   | 1200             | 900            | 1390.5                        | ND                | ND            | ND                | ND                | 0.0               | 0.0             | 0.0             | 0.0             | 0.0               | 0.0           | 0.0           |
|       | 6072   | 900              | 750            | 777.8                         | ND                | ND            | ND                | ND                | 0.0               | 0.0             | 0.0             | 0.0             | 0.0               | 0.0           | 0.0           |
|       | 6073   | 750              | 550            | 1159.3                        | ND                | ND            | ND                | ND                | 0.0               | 0.0             | 0.0             | 0.0             | 55.2              | 0.0           | 0.0           |
|       | 6074   | 550              | 350            | 1358.1                        | ND                | ND            | ND                | ND                | 0.0               | 0.0             | 0.0             | 0.0             | 0.0               | 0.0           | 23.6          |
|       | 6075   | 350              | 150            | 1046.6                        | ND                | ND            | ND                | ND                | 0.0               | 0.0             | 0.0             | 0.0             | 30.6              | 0.0           | 30.6          |
|       | 6076   | 150              | 80             | 557                           | ND                | ND            | ND                | ND                | 0.0               | 0.0             | 0.0             | 0.0             | 229.8             | 229.8         | 344.7         |
|       | 6077   | 80               | 20             | 487.1                         | ND                | ND            | ND                | ND                | 0.0               | 0.0             | 0.0             | 0.0             | 5255.6            | 13139.0       | 14715.7       |
|       | 6078   | 20               | 0              | 128.7                         | ND                | ND            | ND                | ND                | 0.0               | 0.0             | 0.0             | 0.0             | 0.0               | 0.0           | 0.0           |
| 615   | 6151   | 550              | 502            | 555.9                         | 0.0               | 0.0           | ND                | ND                | 0.0               | 0.0             | 0.0             | 0.0             | 172.7             | 0.0           | 0.0           |
|       | 6152   | 500              | 450            | 539.6                         | 0.0               | 0.0           | 0.0               | 0.0               | 0.0               | 0.0             | 0.0             | 0.0             | 103.8             | 0.0           | 0.0           |
|       | 6153   | 450              | 400            | 1011.2                        | 0.0               | 0.0           | 0.0               | 0.0               | 0.0               | 0.0             | 0.0             | 0.0             | 585.4             | 0.0           | 0.0           |
|       | 6154   | 400              | 350            | 429.3                         | 0.0               | 0.0           | 0.0               | 0.0               | 0.0               | 0.0             | 0.0             | 0.0             | 577.7             | 0.0           | 0.0           |
|       | 6155   | 350              | 300            | 588.2                         | 0.0               | 0.0           | 0.0               | 0.0               | 0.0               | 0.0             | 0.0             | 0.0             | 16538.6           | 0.0           | 0.0           |
|       | 6156   | 300              | 250            | 389.6                         | 0.0               | 0.0           | 0.0               | 0.0               | 0.0               | 0.0             | 0.0             | 0.0             | 5256.7            | 0.0           | 0.0           |
|       | 6157   | 250              | 200            | 515.3                         | 0.0               | 0.0           | 0.0               | 0.0               | 0.0               | 0.0             | 0.0             | 0.0             | 496.8             | 0.0           | 0.0           |
|       | 6158   | 200              | 150            | 370.3                         | 0.0               | 0.0           | 0.0               | 0.0               | 0.0               | 0.0             | 0.0             | 0.0             | 0.0               | 0.0           | 0.0           |
| 616   | 6161   | 550              | 500            | 710.1                         | 0.0               | 0.0           | ND                | ND                | 0.0               | 0.0             | 0.0             | 0.0             | 292.9             | 0.0           | 0.0           |
|       | 6162   | 500              | 450            | 329.8                         | 0.0               | 0.0           | 0.0               | 0.0               | 0.0               | 0.0             | 0.0             | 0.0             | 169.8             | 0.0           | 0.0           |
|       | 6163   | 450              | 400            | 1209.4                        | 0.0               | 0.0           | 0.0               | 0.0               | 0.0               | 0.0             | 0.0             | 0.0             | 66.1              | 0.0           | 0.0           |
|       | 6164   | 400              | 350            | 736.9                         | 0.0               | 0.0           | 0.0               | 0.0               | 0.0               | 0.0             | 0.0             | 0.0             | 1248.5            | 0.0           | 0.0           |
|       | 6165   | 350              | 300            | 385                           | 0.0               | 0.0           | 0.0               | 0.0               | 0.0               | 0.0             | 0.0             | 0.0             | 33911.7           | 0.0           | 0.0           |
|       | 6166   | 300              | 250            | 452.8                         | 0.0               | 0.0           | ND                | ND                | 0.0               | 0.0             | 0.0             | 0.0             | 3109.5            | 0.0           | 0.0           |
|       | 6167   | 250              | 200            | 405.7                         | 0.0               | 0.0           | 0.0               | 0.0               | 0.0               | 0.0             | 0.0             | 0.0             | 1893.0            | 0.0           | 0.0           |
|       | 6168   | 200              | 150            | 686.8                         | 0.0               | 0.0           | 0.0               | 0.0               | 0.0               | 0.0             | 0.0             | 0.0             | 0.0               | 0.0           | 0.0           |
| 617   | 6173   | 750              | 550            | 1000.5                        | 0.0               | 0.0           | ND                | ND                | 0.0               | 0.0             | 0.0             | 0.0             | 191.9             | 0.0           | 0.0           |
| 618   | 6181   | 150              | 100            | 731.3                         | 0.0               | 0.0           | ND                | ND                | 0.0               | 0.0             | 0.0             | 0.0             | 21.9              | 0.0           | 0.0           |
|       | 6182   | 100              | 80             | 457.7                         | 0.0               | 0.0           | ND                | ND                | 0.0               | 0.0             | 0.0             | 0.0             | 279.7             | 0.0           | 0.0           |
|       | 6183   | 80               | 60             | 349                           | 0.0               | 0.0           | 0.0               | 0.0               | 0.0               | 0.0             | 0.0             | 0.0             | 550.1             | 0.0           | 0.0           |
|       | 6184   | 60               | 50             | 229.7                         | 0.0               | 0.0           | 0.0               | 0.0               | 0.0               | 0.0             | 0.0             | 0.0             | 4318.7            | 0.0           | 0.0           |
|       | 6185   | 50               | 40             | 431.4                         | 0.0               | 0.0           | 0.0               | 0.0               | 0.0               | 0.0             | 0.0             | 0.0             | 2967.1            | 0.0           | 0.0           |
|       | 6186   | 40               | 30             | 282.3                         | 0.0               | 0.0           | ND                | ND                | 0.0               | 0.0             | 0.0             | 0.0             | 1813.7            | 0.0           | 0.0           |
|       | 6187   | 30               | 20             | 273.9                         | 0.0               | 0.0           | 0.0               | 0.0               | 0.0               | 0.0             | 0.0             | 0.0             | 0.0               | 0.0           | 0.0           |
|       | 6188   | 20               | 0              | 397.7                         | 0.0               | 0.0           | 0.0               | 0.0               | 0.0               | 0.0             | 0.0             | 0.0             | 0.0               | 0.0           | 0.0           |
| 619   | 6191   | 1200             | 1100           | 1287.4                        | 0.0               | 0.0           | ND                | ND                | 0.0               | 0.0             | 0.0             | 0.0             | 18.6              | 0.0           | 0.0           |
|       | 6192   | 1100             | 1000           | 808.7                         | 19.8              | 0.0           | ND                | ND                | 0.0               | 0.0             | 0.0             | 0.0             | 9.9               | 0.0           | 0.0           |
|       | 6193   | 1000             | 950            | 756.3                         | 10.6              | 0.0           | ND                | ND                | 0.0               | 0.0             | 0.0             | 0.0             | 21.2              | 0.0           | 0.0           |
|       | 6194   | 950              | 900            | 959.8                         | 0.0               | 0.0           | ND                | ND                | 0.0               | 0.0             | 0.0             | 0.0             | 16.7              | 0.0           | 0.0           |
|       | 6195   | 900              | 850            | 612                           | 0.0               | 0.0           | 0.0               | 0.0               | 0.0               | 0.0             | 0.0             | 0.0             | 26.1              | 0.0           | 0.0           |
|       | 6196   | 850              | 800            | 438.1                         | 18.3              | 0.0           | ND                | ND                | 0.0               | 0.0             | 0.0             | 0.0             | 347.0             | 0.0           | 0.0           |
|       | 6197   | 800              | 750            | 618.1                         | 0.0               | 12.9          | ND                | ND                | 0.0               | 0.0             | 0.0             | 0.0             | 77.7              | 0.0           | 0.0           |
|       | 6198   | 750              | 700            | 642.4                         | 24.9              | 0.0           | ND                | ND                | 0.0               | 0.0             | 0.0             | 0.0             | 99.6              | 0.0           | 0.0           |
| 621   | 6211   | 150              | 100            | 517.2                         | 0.0               | 0.0           | ND                | ND                | 0.0               | 0.0             | 0.0             | 0.0             | 247.5             | 0.0           | 0.0           |
|       | 6212   | 100              | 80             | 244                           | 0.0               | 0.0           | 0.0               | 0.0               | 0.0               | 0.0             | 0.0             | 0.0             | 524.6             | 0.0           | 0.0           |
|       | 6213   | 80               | 60             | 383.3                         | 0.0               | 0.0           | 0.0               | 0.0               | 0.0               | 0.0             | 0.0             | 0.0             | 628.6             | 0.0           | 0.0           |
|       | 6214   | 60               | 50             | 180.5                         | 0.0               | 0.0           | 0.0               | 0.0               | 0.0               | 0.0             | 0.0             | 0.0             | 1985.6            | 0.0           | 0.0           |
|       | 6215   | 50               | 40             | 147.8                         | 0.0               | 0.0           | 0.0               | 0.0               | 0.0               | 0.0             | 0.0             | 0.0             | 866.0             | 0.0           | 0.0           |
|       | 6216   | 40               | 30             | 232                           | 0.0               | 0.0           | 0.0               | 0.0               | 0.0               | 0.0             | 0.0             | 0.0             | 3678.2            | 0.0           | 0.0           |
|       | 6217   | 30               | 20             | 93.5                          | 0.0               | 0.0           | 0.0               | 0.0               | 0.0               | 0.0             | 0.0             | 0.0             | 0.0               | 0.0           | 0.0           |
|       | 6218   | 20               | 0              | 398.1                         | 0.0               | 0.0           | 0.0               | 0.0               | 0.0               | 0.0             | 0.0             | 0.0             | 0.0               | 0.0           | 0.0           |
| 623   | 6231   | 775              | 733            | 691                           | 23.2              | 0.0           | ND                | ND                | 0.0               | 0.0             | 0.0             | 0.0             | 254.7             | 0.0           | 0.0           |
|       | 6232   | 733              | 700            | 759.5                         | 0.0               | 0.0           | ND                | ND                | 0.0               | 0.0             | 0.0             | 0.0             | 294.9             | 0.0           | 0.0           |
|       | 6233   | 700              | 675            | 658.6                         | 0.0               | 0.0           | ND                | ND                | 0.0               | 0.0             | 0.0             | 0.0             | 48.6              | 0.0           | 0.0           |
|       | 6234   | 675              | 650            | 533.6                         | 0.0               | 90.0          | ND                | ND                | 0.0               | 0.0             | 0.0             | 0.0             | 0.0               | 0.0           | 0.0           |
|       | 6235   | 650              | 625            | 870.2                         | 0.0               | 0.0           | ND                | ND                | 0.0               | 0.0             | 0.0             | 0.0             | 18.4              | 0.0           | 0.0           |
|       | 6236   | 625              | 600            | 490.3                         | 0.0               | 0.0           | ND                | ND                | 0.0               | 0.0             | 0.0             | 0.0             | 130.5             | 0.0           | 0.0           |
|       | 6237   | 600              | 575            | 573.6                         | 0.0               | 0.0           | ND                | ND                | 0.0               | 0.0             | 0.0             | 0.0             | 446.3             | 0.0           | 0.0           |
|       | 6238   | 575              | 550            | 523                           | 0.0               | 0.0           | ND                | ND                | 0.0               | 0.0             | 0.0             | 0.0             | 367.1             | 0.0           | 0.0           |
| 626   | 6261   | 150              | 100            | 481                           | 0.0               | 0.0           | ND                | ND                | 0.0               | 0.0             | 0.0             | 0.0             | 0.0               | 532.2         | 266.1         |
|       | 6262   | 100              | 80             | 431.6                         | 0.0               | 0.0           | ND                | ND                | 0.0               | 0.0             | 0.0             | 0.0             | 0.0               | 1779.4        | 1779.4        |
|       | 6263   | 80               | 60             | 503.8                         | 0.0               | 0.0           | ND                | ND                | 0.0               | 0.0             | 0.0             | 0.0             | 1016.3            | 105184.6      | 106709.0      |
|       | 6264   | 60               | 50             | 241.9                         | 0.0               | 0.0           | ND                | ND                | 0.0               | 0.0             | 0.0             | 0.0             | 2645.7            | 19578.3       | 26986.4       |
|       | 6265   | 50               | 40             | 201.9                         | 0.0               | 0.0           | ND                | ND                | 0.0               | 0.0             | 0.0             | 0.0             | 0.0               | 0.0           | 1268.0        |
|       | 6266   | 40               | 30             | 152.1                         | 0.0               | 0.0           | ND                | ND                | 0.0               | 0.0             | 0.0             | 0.0             | 0.0               | 0.0           | 0.0           |
|       | 6267   | 30               | 20             | 164.4                         | 0.0               | 0.0           | ND                | ND                | 0.0               | 0.0             | 0.0             | 0.0             | 0.0               | 778.6         | 0.0           |
|       | 6268   | 20               | 0              | 274.5                         | 0.0               | 0.0           | ND                | ND                | 0.0               | 0.0             | 0.0             | 0.0             | 0.0               | 1067.4        | 0.0           |
| 628   | 6281   | 550              | 500            | 633.4                         | ND                | ND            | ND                | ND                | 0.0               | 0.0             | 0.0             | 0.0             | 0.0               | 0.0           | 50.5          |
|       | 6282   | 500              | 450            | 627.2                         | ND                | ND            | ND                | ND                | 0.0               | 0.0             | 0.0             | 0.0             | 0.0               | 0.0           | 0.0           |
|       | 6283   | 450              | 400            | 592.4                         | ND                | ND            | ND                | ND                | 0.0               | 0.0             | 0.0             | 0.0             | 0.0               | 54.0          | 0.0           |
|       | 6284   | 400              | 350            | 655.1                         | ND                | ND            | ND                | ND                | 0.0               | 0.0             | 0.0             | 0.0             | 0.0               | 0.0           | 48.8          |

Wishner Supplementary Table 1

| Tow # | Net ID | Start Depth<br>m | End Depth<br>m | Vol. Filtr.<br>m <sup>3</sup> | Dis pal<br>Adults | Dis pal<br>C5 | Eua mag<br>Adults | Eua nod<br>Adults | Euc cal<br>Adults | Euc cal<br>C4 M | Euc cal<br>C5 M | Euc cal<br>C5 F | Euc ine<br>Adults | Euc ine<br>C1 | Euc ine<br>C2 |
|-------|--------|------------------|----------------|-------------------------------|-------------------|---------------|-------------------|-------------------|-------------------|-----------------|-----------------|-----------------|-------------------|---------------|---------------|
|       | 6286   | 300              | 250            | 606.7                         | ND                | ND            | ND                | ND                | 0.0               | 0.0             | 0.0             | 0.0             | 0.0               | 0.0           | 0.0           |
|       | 6287   | 250              | 200            | 992.3                         | ND                | ND            | ND                | ND                | 0.0               | 0.0             | 0.0             | 0.0             | 0.0               | 0.0           | 0.0           |
|       | 6288   | 200              | 150            | 626.3                         | 0.0               | 0.0           | ND                | ND                | 0.0               | 0.0             | 0.0             | 0.0             | 0.0               | 0.0           | 0.0           |
| 630   | 6301   | 550              | 500            | 702.7                         | ND                | ND            | ND                | ND                | 0.0               | 0.0             | 0.0             | 0.0             | 22.8              | 34.2          | 22.8          |
|       | 6302   | 500              | 450            | 765.6                         | ND                | ND            | ND                | ND                | 0.0               | 0.0             | 0.0             | 0.0             | 10.4              | 0.0           | 20.9          |
|       | 6303   | 450              | 400            | 915.3                         | ND                | ND            | ND                | ND                | 0.0               | 0.0             | 0.0             | 0.0             | 17.5              | 0.0           | 0.0           |
|       | 6304   | 400              | 350            | 738.6                         | ND                | ND            | ND                | ND                | 0.0               | 0.0             | 0.0             | 0.0             | 21.7              | 0.0           | 21.7          |
|       | 6305   | 350              | 300            | 659.3                         | ND                | ND            | ND                | ND                | 0.0               | 0.0             | 0.0             | 0.0             | 0.0               | 0.0           | 0.0           |
|       | 6306   | 300              | 250            | 583.4                         | ND                | ND            | ND                | ND                | 0.0               | 0.0             | 0.0             | 0.0             | 27.4              | 54.9          | 0.0           |
|       | 6307   | 250              | 200            | 763.6                         | ND                | ND            | ND                | ND                | 0.0               | 0.0             | 0.0             | 0.0             | 0.0               | 83.8          | 0.0           |
|       | 6308   | 200              | 150            | 502.6                         | 0.0               | 0.0           | ND                | ND                | 0.0               | 0.0             | 0.0             | 0.0             | 0.0               | 31.8          | 63.7          |
| 631   | 6311   | 1000             | 900            | 1055                          | ND                | ND            | 0.0               | 0.0               | 0.0               | 0.0             | 0.0             | 0.0             | 0.0               | 0.0           | 15.2          |
|       | 6312   | 900              | 875            | 831.2                         | 0.0               | 0.0           | 0.0               | 0.0               | 0.0               | 0.0             | 0.0             | 0.0             | 77.0              | 0.0           | 0.0           |
|       | 6313   | 875              | 850            | 773.9                         | 0.0               | 0.0           | 0.0               | 0.0               | 0.0               | 0.0             | 0.0             | 0.0             | 51.7              | 0.0           | 0.0           |
|       | 6314   | 850              | 825            | 645.6                         | 0.0               | 0.0           | 0.0               | 0.0               | 0.0               | 0.0             | 0.0             | 0.0             | 235.4             | 0.0           | 12.4          |
|       | 6315   | 825              | 800            | 655.9                         | ND                | ND            | 0.0               | 0.0               | 0.0               | 0.0             | 0.0             | 0.0             | 2341.8            | 0.0           | 0.0           |
|       | 6316   | 800              | 775            | 782.8                         | 0.0               | 0.0           | 0.0               | 0.0               | 0.0               | 0.0             | 0.0             | 0.0             | 4905.5            | 0.0           | 0.0           |
|       | 6317   | 775              | 700            | 1079.7                        | 0.0               | 0.0           | 0.0               | 0.0               | 0.0               | 0.0             | 0.0             | 0.0             | 37.0              | 0.0           | 0.0           |
|       | 6318   | 700              | 550            | 1005.7                        | 0.0               | 0.0           | 0.0               | 0.0               | 0.0               | 0.0             | 0.0             | 0.0             | 8.0               | 0.0           | 0.0           |
| 632   | 6321   | 1000             | 900            | 1265.8                        | ND                | ND            | ND                | ND                | 0.0               | 0.0             | 0.0             | 0.0             | 12.6              | 0.0           | 50.6          |
|       | 6322   | 900              | 875            | 620.3                         | ND                | ND            | ND                | ND                | 0.0               | 0.0             | 0.0             | 0.0             | 12.9              | 0.0           | 12.9          |
|       | 6323   | 875              | 850            | 751.1                         | ND                | ND            | ND                | ND                | 0.0               | 0.0             | 0.0             | 0.0             | 21.3              | 0.0           | 0.0           |
|       | 6324   | 850              | 825            | 651.7                         | ND                | ND            | ND                | ND                | 0.0               | 0.0             | 0.0             | 0.0             | 245.5             | 0.0           | 0.0           |
|       | 6325   | 825              | 800            | 763.6                         | ND                | ND            | ND                | ND                | 0.0               | 0.0             | 0.0             | 0.0             | 4358.3            | 0.0           | 0.0           |
|       | 6326   | 800              | 775            | 720.5                         | ND                | ND            | ND                | ND                | 0.0               | 0.0             | 0.0             | 0.0             | 1776.5            | 0.0           | 0.0           |
|       | 6327   | 775              | 700            | 1121.7                        | ND                | ND            | ND                | ND                | 0.0               | 0.0             | 0.0             | 0.0             | 0.0               | 42.8          | 0.0           |
|       | 6328   | 700              | 550            | 1980.1                        | ND                | ND            | ND                | ND                | 0.0               | 0.0             | 0.0             | 0.0             | 0.0               | 0.0           | 0.0           |
| 633   | 6331   | 150              | 100            | 749.4                         | 0.0               | 0.0           | ND                | ND                | 0.0               | 0.0             | 0.0             | 0.0             | 56.9              | 0.0           | 113.9         |
|       | 6332   | 100              | 80             | 333.7                         | 0.0               | 0.0           | ND                | ND                | 0.0               | 0.0             | 0.0             | 0.0             | 511.4             | 2045.7        | 4602.9        |
|       | 6333   | 80               | 60             | 412.4                         | 0.0               | 0.0           | ND                | ND                | 0.0               | 0.0             | 0.0             | 0.0             | 4966.1            | 28554.8       | 51522.8       |
|       | 6334   | 60               | 50             | 102.1                         | 0.0               | 0.0           | ND                | ND                | 0.0               | 0.0             | 0.0             | 0.0             | 0.0               | 2507.3        | 0.0           |
|       | 6335   | 50               | 40             | 144.2                         | 0.0               | 0.0           | ND                | ND                | 0.0               | 0.0             | 0.0             | 0.0             | 3106.8            | 0.0           | 0.0           |
|       | 6336   | 40               | 30             | 211.1                         | 0.0               | 0.0           | ND                | ND                | 0.0               | 0.0             | 0.0             | 0.0             | 303.2             | 303.2         | 1819.0        |
|       | 6337   | 30               | 20             | 177.5                         | 0.0               | 0.0           | ND                | ND                | 0.0               | 0.0             | 0.0             | 0.0             | 0.0               | 360.6         | 721.1         |
|       | 6338   | 20               | 0              | 178.4                         | 0.0               | 0.0           | ND                | ND                | 0.0               | 0.0             | 0.0             | 0.0             | 0.0               | 0.0           | 0.0           |
| 635   | 6351   | 150              | 100            | 552.5                         | ND                | ND            | ND                | ND                | 0.0               | 0.0             | 0.0             | 0.0             | 405.4             | 0.0           | 0.0           |
|       | 6352   | 100              | 80             | 267.9                         | ND                | ND            | ND                | ND                | 0.0               | 0.0             | 0.0             | 0.0             | 2508.4            | 0.0           | 0.0           |
|       | 6353   | 80               | 60             | 334.5                         | ND                | ND            | ND                | ND                | 0.0               | 0.0             | 0.0             | 0.0             | 8418.5            | 0.0           | 0.0           |
|       | 6354   | 60               | 50             | 211.4                         | ND                | ND            | ND                | ND                | 0.0               | 0.0             | 0.0             | 0.0             | 3632.9            | 302.7         | 0.0           |
|       | 6355   | 50               | 40             | 168.4                         | ND                | ND            | ND                | ND                | 0.0               | 0.0             | 0.0             | 0.0             | 760.1             | 380.0         | 380.0         |
|       | 6356   | 40               | 30             | 98.2                          | ND                | ND            | ND                | ND                | 0.0               | 0.0             | 0.0             | 0.0             | 2606.9            | 0.0           | 0.0           |
|       | 6357   | 30               | 20             | 248.5                         | ND                | ND            | ND                | ND                | 0.0               | 0.0             | 0.0             | 0.0             | 1030.2            | 0.0           | 0.0           |
|       | 6358   | 20               | 0              | 330.3                         | ND                | ND            | ND                | ND                | 0.0               | 0.0             | 0.0             | 0.0             | 0.0               | 0.0           | 0.0           |
| 636   | 6361   | 1000             | 900            | 979.5                         | ND                | ND            | ND                | ND                | 0.0               | 0.0             | 0.0             | 0.0             | 142.9             | 0.0           | 0.0           |
|       | 6362   | 900              | 750            | 1032.7                        | ND                | ND            | ND                | ND                | 0.0               | 0.0             | 0.0             | 0.0             | 31.0              | 0.0           | 0.0           |
|       | 6363   | 750              | 650            | 935.6                         | ND                | ND            | ND                | ND                | 0.0               | 0.0             | 0.0             | 0.0             | 51.3              | 0.0           | 0.0           |
|       | 6364   | 650              | 625            | 480.5                         | ND                | ND            | ND                | ND                | 0.0               | 0.0             | 0.0             | 0.0             | 33.3              | 0.0           | 0.0           |
|       | 6365   | 625              | 600            | 687.3                         | ND                | ND            | ND                | ND                | 0.0               | 0.0             | 0.0             | 0.0             | 302.6             | 0.0           | 0.0           |
|       | 6366   | 600              | 575            | 866.6                         | ND                | ND            | ND                | ND                | 0.0               | 0.0             | 0.0             | 0.0             | 2030.9            | 0.0           | 0.0           |
|       | 6367   | 575              | 550            | 489.9                         | ND                | ND            | ND                | ND                | 0.0               | 0.0             | 0.0             | 0.0             | 7185.1            | 0.0           | 0.0           |
|       | 6368   | 550              | 525            | 885.4                         | ND                | ND            | ND                | ND                | 0.0               | 0.0             | 0.0             | 0.0             | 18070.9           | 0.0           | 0.0           |
| 637   | 6371   | 550              | 500            | 665.2                         | ND                | ND            | ND                | ND                | 0.0               | 0.0             | 0.0             | 0.0             | 19242.3           | 0.0           | 0.0           |
|       | 6372   | 500              | 450            | 756.3                         | ND                | ND            | ND                | ND                | 0.0               | 0.0             | 0.0             | 0.0             | 803.9             | 0.0           | 0.0           |
|       | 6373   | 450              | 400            | 915.1                         | ND                | ND            | ND                | ND                | 0.0               | 0.0             | 0.0             | 0.0             | 332.2             | 0.0           | 0.0           |
|       | 6374   | 400              | 350            | 751                           | ND                | ND            | ND                | ND                | 0.0               | 0.0             | 0.0             | 0.0             | 532.6             | 0.0           | 0.0           |
|       | 6375   | 350              | 300            | 867                           | ND                | ND            | ND                | ND                | 0.0               | 0.0             | 0.0             | 0.0             | 922.7             | 0.0           | 0.0           |
|       | 6376   | 300              | 250            | 785.2                         | ND                | ND            | ND                | ND                | 0.0               | 0.0             | 0.0             | 0.0             | 4482.9            | 0.0           | 0.0           |
|       | 6377   | 250              | 200            | 815.1                         | ND                | ND            | ND                | ND                | 0.0               | 0.0             | 0.0             | 0.0             | 9618.5            | 0.0           | 0.0           |
|       | 6378   | 200              | 150            | 645.5                         | ND                | ND            | ND                | ND                | 0.0               | 0.0             | 0.0             | 0.0             | 396.6             | 0.0           | 0.0           |
| 638   | 6381   | 150              | 100            | 484                           | ND                | ND            | ND                | ND                | 0.0               | 0.0             | 0.0             | 0.0             | 595.0             | 0.0           | 0.0           |
|       | 6382   | 100              | 80             | 288.7                         | ND                | ND            | ND                | ND                | 0.0               | 0.0             | 0.0             | 0.0             | 1219.3            | 0.0           | 0.0           |
|       | 6383   | 80               | 60             | 329.4                         | ND                | ND            | ND                | ND                | 0.0               | 0.0             | 0.0             | 0.0             | 4857.3            | 0.0           | 0.0           |
|       | 6384   | 60               | 50             | 186.4                         | ND                | ND            | ND                | ND                | 0.0               | 0.0             | 0.0             | 0.0             | 6008.6            | 0.0           | 0.0           |
|       | 6385   | 50               | 40             | 214.6                         | ND                | ND            | ND                | ND                | 0.0               | 0.0             | 0.0             | 0.0             | 4473.4            | 298.2         | 0.0           |
|       | 6386   | 40               | 30             | 188.3                         | ND                | ND            | ND                | ND                | 0.0               | 0.0             | 0.0             | 0.0             | 9856.6            | 1019.6        | 1019.6        |
|       | 6387   | 30               | 20             | 238.5                         | ND                | ND            | ND                | ND                | 0.0               | 0.0             | 0.0             | 0.0             | 8587.0            | 0.0           | 0.0           |
|       | 6388   | 20               | 0              | 337.3                         | ND                | ND            | ND                | ND                | 0.0               | 0.0             | 0.0             | 0.0             | 0.0               | 0.0           | 0.0           |
| 640   | 6401   | 1000             | 900            | 752.1                         | ND                | ND            | ND                | ND                | 0.0               | 0.0             | 0.0             | 0.0             | 170.2             | 0.0           | 0.0           |
|       | 6402   | 900              | 750            | 2037.2                        | ND                | ND            | ND                | ND                | 0.0               | 0.0             | 0.0             | 0.0             | 19.6              | 0.0           | 0.0           |

Wishner Supplementary Table 1

| Tow # | Net ID | Start Depth<br>m | End Depth<br>m | Vol. Filtr.<br>m <sup>3</sup> | Dis pal<br>Adults | Dis pal<br>C5 | Eua mag<br>Adults | Eua nod<br>Adults | Euc cal<br>Adults | Euc cal<br>C4 M | Euc cal<br>C5 M | Euc cal<br>C5 F | Euc ine<br>Adults | Euc ine<br>C1 | Euc ine<br>C2 |
|-------|--------|------------------|----------------|-------------------------------|-------------------|---------------|-------------------|-------------------|-------------------|-----------------|-----------------|-----------------|-------------------|---------------|---------------|
|       | 6403   | 750              | 650            | 1146.6                        | ND                | ND            | ND                | ND                | 0.0               | 0.0             | 0.0             | 0.0             | 14.0              | 0.0           | 0.0           |
|       | 6404   | 650              | 625            | 417.4                         | ND                | ND            | ND                | ND                | 0.0               | 0.0             | 0.0             | 0.0             | 57.5              | 0.0           | 0.0           |
|       | 6405   | 625              | 600            | 754.4                         | ND                | ND            | ND                | ND                | 0.0               | 0.0             | 0.0             | 0.0             | 106.0             | 0.0           | 0.0           |
|       | 6406   | 600              | 575            | 59.1                          | ND                | ND            | ND                | ND                | 0.0               | 0.0             | 0.0             | 0.0             | 28426.4           | 0.0           | 0.0           |
|       | 6407   | 575              | 550            | 490.6                         | ND                | ND            | ND                | ND                | 0.0               | 0.0             | 0.0             | 0.0             | 28699.6           | 0.0           | 0.0           |
| 641   | 6413   | 500              | 450            | 723                           | ND                | ND            | ND                | ND                | 0.0               | 0.0             | 0.0             | 0.0             | 354.1             | 0.0           | 0.0           |
|       | 6414   | 450              | 400            | 763.7                         | ND                | ND            | ND                | ND                | 0.0               | 0.0             | 0.0             | 0.0             | 408.5             | 0.0           | 0.0           |
|       | 6415   | 400              | 350            | 808.9                         | ND                | ND            | ND                | ND                | 0.0               | 0.0             | 0.0             | 0.0             | 801.1             | 0.0           | 0.0           |
|       | 6416   | 350              | 300            | 935                           | ND                | ND            | ND                | ND                | 0.0               | 0.0             | 0.0             | 0.0             | 787.2             | 0.0           | 0.0           |
|       | 6417   | 300              | 250            | 764.4                         | ND                | ND            | ND                | ND                | 0.0               | 0.0             | 0.0             | 0.0             | 8372.6            | 0.0           | 0.0           |
|       | 6418   | 250              | 200            | 834.6                         | ND                | ND            | ND                | ND                | 0.0               | 0.0             | 0.0             | 0.0             | 8128.4            | 0.0           | 0.0           |
| 707   | 7071   | 450              | 400            | 1043.8                        | 0.0               | 0.0           | 0.0               | 0.0               | 11.5              | 15.3            | 0.0             | 19.2            | 69.0              | ND            | ND            |
|       | 7072   | 400              | 350            | 1171.82                       | 0.9               | 0.0           | 0.0               | 0.0               | 1.7               | 2.6             | 0.0             | 1.7             | 9.4               | ND            | ND            |
|       | 7073   | 350              | 300            | 1235.03                       | 0.0               | 0.0           | 0.0               | 0.0               | 0.0               | 3.2             | 0.0             | 0.0             | 0.0               | ND            | ND            |
|       | 7074   | 300              | 250            | 973.35                        | 0.0               | 0.0           | 0.0               | 0.0               | 0.0               | 0.0             | 0.0             | 0.0             | 0.0               | ND            | ND            |
|       | 7075   | 250              | 200            | 1067.66                       | 0.0               | 0.0           | 0.0               | 0.0               | 0.0               | 0.0             | 0.0             | 0.0             | 0.0               | ND            | ND            |
|       | 7076   | 200              | 150            | 918.19                        | 0.0               | 0.0           | 0.0               | 0.0               | 0.0               | 0.0             | 0.0             | 0.0             | 0.0               | ND            | ND            |
|       | 7077   | 150              | 100            | 1033.5                        | 0.0               | 0.0           | 0.0               | 0.0               | 0.0               | 0.0             | 0.0             | 0.0             | 0.0               | ND            | ND            |
|       | 7078   | 100              | 0              | 1250.39                       | 0.0               | 0.0           | 0.0               | 0.0               | 0.0               | 0.0             | 0.0             | 0.0             | 2.4               | ND            | ND            |
| 708   | 7081   | 450              | 400            | 797.95                        | 0.0               | 0.0           | 0.0               | 1.3               | 0.0               | 0.0             | 0.0             | 1.3             | 6.3               | ND            | ND            |
|       | 7082   | 400              | 350            | 703.29                        | 0.0               | 0.0           | 0.0               | 0.0               | 0.0               | 1.4             | 0.0             | 0.0             | 0.0               | ND            | ND            |
|       | 7083   | 350              | 300            | 1097.22                       | 0.0               | 0.0           | 0.0               | 0.0               | 0.9               | 1.8             | 0.0             | 0.0             | 0.0               | ND            | ND            |
|       | 7084   | 300              | 250            | 1796.25                       | 0.0               | 0.0           | 0.0               | 0.0               | 0.0               | 0.0             | 0.0             | 0.0             | 0.0               | ND            | ND            |
|       | 7085   | 250              | 200            | 1098.84                       | 0.0               | 0.0           | 0.0               | 0.0               | 0.0               | 0.0             | 0.0             | 0.0             | 0.0               | ND            | ND            |
|       | 7086   | 200              | 150            | 1512.72                       | 0.0               | 0.0           | 0.0               | 0.0               | 0.0               | 0.7             | 0.0             | 0.0             | 0.0               | ND            | ND            |
|       | 7087   | 150              | 100            | 1239.14                       | 0.0               | 0.0           | 0.0               | 0.0               | 0.0               | 0.0             | 0.0             | 0.0             | 0.8               | ND            | ND            |
|       | 7088   | 100              | 0              | 2486.06                       | 0.0               | 0.0           | 0.0               | 0.0               | 0.0               | 0.0             | 0.0             | 0.0             | 0.0               | ND            | ND            |
| 709   | 7091   | 1000             | 850            | 2477.28                       | 6.9               | 0.4           | 0.0               | 0.8               | 0.0               | 0.4             | 0.0             | 1.2             | 0.4               | ND            | ND            |
|       | 7092   | 850              | 800            | 1260.68                       | 12.7              | 0.0           | 0.8               | 0.8               | 0.0               | 0.8             | 0.0             | 0.8             | 0.8               | ND            | ND            |
|       | 7093   | 800              | 750            | 1987.4                        | 6.5               | 0.0           | 1.0               | 0.0               | 0.5               | 1.0             | 0.0             | 1.5             | 0.0               | ND            | ND            |
|       | 7094   | 750              | 700            | 1073.91                       | 16.8              | 0.0           | 0.0               | 0.0               | 0.0               | 4.7             | 0.9             | 6.5             | 0.0               | ND            | ND            |
|       | 7095   | 700              | 650            | 2242.08                       | 22.3              | 0.0           | 0.9               | 0.4               | 0.0               | 4.5             | 0.4             | 4.0             | 0.0               | ND            | ND            |
|       | 7096   | 650              | 600            | 1575.67                       | 24.8              | 0.0           | 0.0               | 0.0               | 0.6               | 7.0             | 0.0             | 6.3             | 0.0               | ND            | ND            |
|       | 7097   | 600              | 550            | 1683.91                       | 16.0              | 0.6           | 0.0               | 0.0               | 0.0               | 4.2             | 0.6             | 4.2             | 3.0               | ND            | ND            |
|       | 7098   | 550              | 450            | 2699.13                       | 0.0               | 0.0           | 0.0               | 0.0               | 3.0               | 14.8            | 0.0             | 8.9             | 20.7              | ND            | ND            |
| 710   | 7101   | 1000             | 850            | 3154.6                        | 10.5              | 0.0           | 0.6               | 0.3               | 0.3               | 0.3             | 0.0             | 1.0             | 0.0               | ND            | ND            |
|       | 7102   | 850              | 800            | 1937.25                       | 9.8               | 0.0           | 2.1               | 0.0               | 0.0               | 1.5             | 0.5             | 0.0             | 0.0               | ND            | ND            |
|       | 7103   | 800              | 750            | 1003.55                       | 10.0              | 0.0           | 2.0               | 0.0               | 0.0               | 1.0             | 0.0             | 0.0             | 0.0               | ND            | ND            |
|       | 7104   | 750              | 700            | 1705.36                       | 10.6              | 0.0           | 1.8               | 0.0               | 0.0               | 1.8             | 0.0             | 4.1             | 0.0               | ND            | ND            |
|       | 7105   | 700              | 650            | 1109.5                        | 26.1              | 0.0           | 2.7               | 0.0               | 0.0               | 2.7             | 0.0             | 7.2             | 0.0               | ND            | ND            |
|       | 7106   | 650              | 600            | 777.51                        | 14.1              | 0.0           | 2.6               | 0.0               | 0.0               | 2.6             | 0.0             | 6.4             | 0.0               | ND            | ND            |
|       | 7107   | 600              | 550            | 972                           | 24.7              | 2.1           | 0.0               | 0.0               | 3.1               | 21.6            | 0.0             | 11.3            | 1.0               | ND            | ND            |
|       | 7108   | 550              | 450            | 1884.18                       | 6.4               | 4.2           | 0.0               | 0.0               | 0.0               | 2.1             | 0.0             | 19.1            | 12.7              | ND            | ND            |
| 711   | 7111   | 468              | 460            | 989.76                        | 0.0               | 0.0           | 0.0               | 0.0               | 1.0               | 2.0             | 0.0             | 1.0             | 15.2              | ND            | ND            |
|       | 7112   | 460              | 463            | 1104.78                       | 0.0               | 0.0           | 0.0               | 0.0               | 1.8               | 1.8             | 0.0             | 14.5            | 41.6              | ND            | ND            |
|       | 7113   | 463              | 384            | 1558.78                       |                   |               |                   |                   |                   |                 |                 |                 |                   |               |               |
|       | 7114   | 384              | 390            | 879.34                        | 0.0               | 0.0           | 0.0               | 0.0               | 1.1               | 1.1             | 0.0             | 2.3             | 5.7               | ND            | ND            |
|       | 7115   | 390              | 390            | 917.76                        | 0.0               | 0.0           | 0.0               | 0.0               | 0.0               | 2.2             | 0.0             | 1.1             | 2.2               | ND            | ND            |
|       | 7116   | 390              | 367            | 334.63                        |                   |               |                   |                   |                   |                 |                 |                 |                   |               |               |
|       | 7117   | 367              | 385            | 948.53                        | 0.0               | 0.0           | 0.0               | 0.0               | 0.0               | 1.1             | 0.0             | 1.1             | 3.2               | ND            | ND            |
|       | 7118   | 385              | 348            | 1011.5                        | 0.0               | 0.0           | 0.0               | 0.0               | 0.0               | 1.0             | 0.0             | 2.0             | 2.0               | ND            | ND            |
| 713   | 7131   | 800              | 775            | 1018.77                       | 6.9               | 0.0           | 1.0               | 0.0               | 0.0               | 0.0             | 0.0             | 0.0             | 0.0               | ND            | ND            |
|       | 7132   | 775              | 750            | 1030.97                       | 9.7               | 0.0           | 1.9               | 0.0               | 0.0               | 1.0             | 0.0             | 0.0             | 0.0               | ND            | ND            |
|       | 7133   | 750              | 725            | 1201.92                       | 20.0              | 0.0           | 2.5               | 0.0               | 0.0               | 0.0             | 0.0             | 0.0             | 0.0               | ND            | ND            |
|       | 7134   | 725              | 700            | 1701.29                       | 30.6              | 0.0           | 1.8               | 0.6               | 0.0               | 1.8             | 0.0             | 2.9             | 0.6               | ND            | ND            |
|       | 7135   | 700              | 675            | 1108.22                       | 40.6              | 0.0           | 0.0               | 0.0               | 0.0               | 4.5             | 0.0             | 2.7             | 0.0               | ND            | ND            |
|       | 7136   | 675              | 650            | 1049.67                       | 31.4              | 0.0           | 1.9               | 0.0               | 1.0               | 10.5            | 0.0             | 3.8             | 0.0               | ND            | ND            |
|       | 7137   | 650              | 625            | 1022.57                       | 16.6              | 0.0           | 0.0               | 1.0               | 0.0               | 0.0             | 0.0             | 2.0             | 1.0               | ND            | ND            |
|       | 7138   | 625              | 600            | 1154.37                       | 18.2              | 6.9           | 0.0               | 0.0               | 1.7               | 1.7             | 0.9             | 4.3             | 0.9               | ND            | ND            |
| 716   | 7161   | 1000             | 800            | 2623                          | 10.7              | 0.0           | 0.0               | 0.0               | 0.0               | 0.0             | 0.0             | 0.0             | 0.0               | ND            | ND            |
|       | 7162   | 800              | 700            | 905                           | 22.1              | 0.0           | 1.1               | 2.2               | 0.0               | 0.0             | 0.0             | 0.0             | 0.0               | ND            | ND            |
|       | 7163   | 700              | 600            | 1069                          | 4.7               | 0.0           | 0.0               | 0.0               | 0.0               | 0.9             | 0.0             | 2.8             | 31.8              | ND            | ND            |
|       | 7164   | 600              | 500            | 956                           | 0.0               | 0.0           | 0.0               | 0.0               | 0.0               | 3.1             | 0.0             | 1.0             | 121.3             | ND            | ND            |
|       | 7165   | 500              | 400            | 990                           | 0.0               | 0.0           | 0.0               | 0.0               | 0.0               | 8.1             | 0.0             | 6.1             | 87.9              | ND            | ND            |
|       | 7166   | 400              | 300            | 827                           | 0.0               | 0.0           | 0.0               | 0.0               | 0.0               | 0.0             | 0.0             | 1.2             | 55.6              | ND            | ND            |
|       | 7167   | 300              | 200            | 778                           | 0.0               | 0.0           | 0.0               | 0.0               | 0.0               | 0.0             | 0.0             | 0.0             | 1.3               | ND            | ND            |
|       | 7168   | 200              | 100            | 1041                          | 0.0               | 0.0           | 0.0               | 0.0               | 0.0               | 0.0             | 0.0             | 0.0             | 1.0               | ND            | ND            |
|       | 7169   | 100              | 0              | 1971                          | 0.0               | 0.0           | 0.0               | 0.0               | 0.0               | 0.0             | 0.0             | 0.0             | 0.0               | ND            | ND            |
| 718   | 7181   | 650              | 600            | 1281                          | 0.0               | 0.0           | 0.0               | 0.0               | 0.0               | 0.0             | 0.0             | 0.0             | 3.9               | ND            | ND            |
|       | 7182   | 600              | 550            | 1328                          | 0.0               | 0.0           | 0.0               | 0.0               | 0.0               | 0.8             | 0.0             | 0.8             | 4.5               | ND            | ND            |
|       | 7183   | 550              | 500            | 1350                          | 0.0               | 0.0           | 0.0               | 0.7               | 0.0               | 2.2             | 0.0             | 0.7             | 11.1              | ND            | ND            |

Wishner Supplementary Table 1

| Tow # | Net ID | Start Depth<br>m | End Depth<br>m | Vol. Filt.<br>m <sup>3</sup> | Dis pal<br>Adults | Dis pal<br>C5 | Eua mag<br>Adults | Eua nod<br>Adults | Euc cal<br>Adults | Euc cal<br>C4 M | Euc cal<br>C5 M | Euc cal<br>C5 F | Euc ine<br>Adults | Euc ine<br>C1 | Euc ine<br>C2 |
|-------|--------|------------------|----------------|------------------------------|-------------------|---------------|-------------------|-------------------|-------------------|-----------------|-----------------|-----------------|-------------------|---------------|---------------|
|       | 7184   | 500              | 475            | 1091                         | 0.0               | 0.0           | 0.0               | 0.0               | 0.0               | 2.7             | 0.0             | 2.7             | 48.6              | ND            | ND            |
|       | 7185   | 475              | 450            | 1131                         | 0.0               | 0.0           | 0.0               | 0.9               | 0.9               | 0.9             | 0.9             | 6.2             | 63.7              | ND            | ND            |
|       | 7186   | 450              | 425            | 1148                         | 0.0               | 0.0           | 0.0               | 0.0               | 0.9               | 0.0             | 0.0             | 0.9             | 27.0              | ND            | ND            |
|       | 7187   | 425              | 400            | 1147                         | 0.0               | 0.0           | 0.0               | 0.0               | 0.0               | 0.0             | 0.0             | 0.0             | 12.2              | ND            | ND            |
|       | 7188   | 400              | 350            | 1478                         | 0.0               | 0.0           | 0.0               | 0.0               | 0.0               | 0.0             | 0.0             | 0.0             | 0.7               | ND            | ND            |
| 719   | 7191   | 650              | 600            | 993                          | 4.0               | 0.0           | 0.0               | 0.0               | 0.0               | 0.0             | 0.0             | 0.0             | 1.0               | ND            | ND            |
|       | 7192   | 600              | 550            | 1096                         | 0.0               | 0.0           | 0.0               | 0.0               | 0.0               | 0.0             | 0.0             | 0.9             | 14.6              | ND            | ND            |
|       | 7193   | 550              | 500            | 1248                         | 0.0               | 0.0           | 0.0               | 0.0               | 0.0               | 0.0             | 0.0             | 0.8             | 226.8             | ND            | ND            |
|       | 7194   | 500              | 475            | 1184                         | 0.0               | 0.0           | 0.0               | 0.0               | 0.0               | 0.0             | 0.0             | 0.0             | 190.0             | ND            | ND            |
|       | 7195   | 475              | 450            | 1075                         | 0.0               | 0.0           | 0.0               | 0.0               | 0.0               | 0.0             | 0.0             | 0.0             | 141.4             | ND            | ND            |
|       | 7196   | 450              | 425            | 966                          | 0.0               | 0.0           | 0.0               | 1.0               | 1.0               | 0.0             | 0.0             | 2.1             | 94.2              | ND            | ND            |
|       | 7197   | 425              | 400            | 1118                         | 0.0               | 0.0           | 0.0               | 0.0               | 0.0               | 0.9             | 0.9             | 0.9             | 25.9              | ND            | ND            |
|       | 7198   | 400              | 350            | 1333                         | 0.0               | 0.0           | 0.0               | 0.8               | 0.0               | 0.8             | 0.0             | 2.3             | 1.5               | ND            | ND            |
| 720   | 7201   | 650              | 600            | 844                          | 0.0               | 0.0           | 0.0               | 0.0               | 0.0               | 1.2             | 0.0             | 4.7             | 20.1              | ND            | ND            |
|       | 7202   | 600              | 550            | 1067                         | 0.0               | 0.0           | 0.0               | 0.0               | 0.0               | 0.0             | 0.0             | 0.0             | 185.6             | ND            | ND            |
|       | 7203   | 550              | 500            | 1194                         | 0.0               | 0.0           | 0.0               | 0.0               | 0.0               | 0.0             | 0.0             | 0.0             | 192.6             | ND            | ND            |
|       | 7204   | 500              | 475            | 1003                         | 0.0               | 0.0           | 0.0               | 0.0               | 0.0               | 0.0             | 0.0             | 0.0             | 181.5             | ND            | ND            |
|       | 7205   | 475              | 450            | 1133                         | 0.0               | 0.0           | 0.0               | 0.0               | 0.0               | 0.0             | 0.9             | 0.0             | 165.9             | ND            | ND            |
|       | 7206   | 450              | 425            | 886                          | 0.0               | 0.0           | 0.0               | 0.0               | 0.0               | 0.0             | 0.0             | 0.0             | 124.2             | ND            | ND            |
|       | 7207   | 425              | 400            | 1165                         | 0.0               | 0.0           | 0.0               | 0.0               | 0.0               | 0.0             | 0.0             | 0.0             | 61.8              | ND            | ND            |
|       | 7208   | 400              | 350            | 1062                         | 0.0               | 0.0           | 0.0               | 0.0               | 0.0               | 0.9             | 0.0             | 1.9             | 21.7              | ND            | ND            |
| 721   | 7211   | 350              | 300            | 1117                         | 0.0               | 0.0           | 0.0               | 0.0               | 0.0               | 0.0             | 0.0             | 0.0             | 0.9               | ND            | ND            |
|       | 7212   | 300              | 250            | 873                          | 0.0               | 0.0           | 0.0               | 0.0               | 0.0               | 0.0             | 0.0             | 0.0             | 0.0               | ND            | ND            |
|       | 7213   | 250              | 200            | 710                          | 0.0               | 0.0           | 0.0               | 0.0               | 0.0               | 0.0             | 0.0             | 0.0             | 0.0               | ND            | ND            |
|       | 7214   | 200              | 150            | 966                          | 0.0               | 0.0           | 0.0               | 0.0               | 0.0               | 0.0             | 0.0             | 0.0             | 0.0               | ND            | ND            |
|       | 7215   | 150              | 125            | 961                          | 0.0               | 0.0           | 0.0               | 0.0               | 0.0               | 0.0             | 0.0             | 0.0             | 0.0               | ND            | ND            |
|       | 7216   | 125              | 100            | 977                          | 0.0               | 0.0           | 0.0               | 0.0               | 0.0               | 0.0             | 0.0             | 0.0             | 0.0               | ND            | ND            |
|       | 7217   | 100              | 75             | 1042                         | 0.0               | 0.0           | 0.0               | 0.0               | 0.0               | 0.0             | 0.0             | 0.0             | 0.0               | ND            | ND            |
|       | 7218   | 75               | 50             | 1005                         | 0.0               | 0.0           | 0.0               | 0.0               | 0.0               | 0.0             | 0.0             | 0.0             | 0.0               | ND            | ND            |
|       | 7219   | 50               | 0              | 1287                         | 0.0               | 0.0           | 0.0               | 0.0               | 0.0               | 0.0             | 0.0             | 0.0             | 0.0               | ND            | ND            |
| 722   | 7221   | 350              | 300            | 1499                         | 0.0               | 0.0           | 0.0               | 5.3               | 0.0               | 0.0             | 0.0             | 0.0             | 10.7              | ND            | ND            |
|       | 7222   | 300              | 250            | 1018                         | 0.0               | 0.0           | 0.0               | 0.0               | 0.0               | 0.0             | 0.0             | 0.0             | 2.9               | ND            | ND            |
|       | 7223   | 250              | 200            | 866                          | 0.0               | 0.0           | 0.0               | 0.0               | 0.0               | 0.0             | 0.0             | 0.0             | 3.5               | ND            | ND            |
|       | 7224   | 200              | 150            | 859                          | 0.0               | 0.0           | 0.0               | 0.0               | 0.0               | 0.0             | 0.0             | 0.0             | 3.5               | ND            | ND            |
|       | 7225   | 150              | 125            | 786                          | 0.0               | 0.0           | 0.0               | 0.0               | 0.0               | 0.0             | 0.0             | 0.0             | 1.3               | ND            | ND            |
|       | 7226   | 125              | 100            | 892                          | 0.0               | 0.0           | 0.0               | 0.0               | 0.0               | 0.0             | 0.0             | 0.0             | 1.1               | ND            | ND            |
|       | 7227   | 100              | 75             | 757                          | 0.0               | 0.0           | 0.0               | 0.0               | 0.0               | 0.0             | 0.0             | 0.0             | 0.0               | ND            | ND            |
|       | 7228   | 75               | 50             | 1085                         | 0.0               | 0.0           | 0.0               | 0.0               | 0.0               | 0.0             | 0.0             | 0.0             | 0.0               | ND            | ND            |
|       | 7229   | 50               | 0              | 1171                         | 0.0               | 0.0           | 0.0               | 0.0               | 0.0               | 0.0             | 0.0             | 0.0             | 0.0               | ND            | ND            |
| 725   | 7251   | 1000             | 800            | 2407                         | 10.8              | 0.0           | 2.1               | 0.4               | 0.0               | 0.0             | 0.0             | 0.0             | 0.8               | ND            | ND            |
|       | 7252   | 800              | 700            | 1667                         | 15.0              | 0.0           | 2.4               | 0.0               | 0.0               | 0.6             | 0.6             | 1.8             | 0.0               | ND            | ND            |
|       | 7253   | 700              | 600            | 1472                         | 0.7               | 0.7           | 0.7               | 0.7               | 0.0               | 4.1             | 0.0             | 2.0             | 2.0               | ND            | ND            |
|       | 7254   | 600              | 500            | 1087                         | 4.6               | 0.0           | 0.9               | 0.9               | 0.0               | 2.8             | 1.8             | 0.0             | 11.0              | ND            | ND            |
|       | 7255   | 500              | 400            | 850                          | 0.0               | 0.0           | 0.0               | 0.0               | 1.2               | 1.2             | 0.0             | 2.4             | 14.1              | ND            | ND            |
|       | 7256   | 400              | 300            | 1122                         | 0.0               | 0.0           | 0.0               | 0.0               | 0.0               | 0.0             | 0.0             | 0.0             | 0.0               | ND            | ND            |
|       | 7257   | 300              | 200            | 886                          | 0.0               | 0.0           | 0.0               | 1.1               | 0.0               | 0.0             | 0.0             | 0.0             | 0.0               | ND            | ND            |
|       | 7258   | 200              | 100            | 1088                         | 0.0               | 0.0           | 0.0               | 0.0               | 0.0               | 0.0             | 0.0             | 0.0             | 0.0               | ND            | ND            |
|       | 7259   | 100              | 0              | 1161                         | 3.4               | 0.0           | 0.0               | 1.7               | 0.0               | 0.0             | 0.0             | 0.0             | 3.4               | ND            | ND            |
| 727   | 7271   | 825              | 800            | 912                          | 5.5               | 0.0           | 0.0               | 0.0               | 0.0               | 1.1             | 0.0             | 0.0             | 1.1               | ND            | ND            |
|       | 7272   | 800              | 775            | 1119                         | 13.4              | 0.0           | 1.8               | 1.8               | 0.0               | 0.9             | 0.0             | 0.9             | 0.0               | ND            | ND            |
|       | 7273   | 775              | 725            | 1366                         | 9.5               | 0.0           | 3.7               | 0.7               | 0.0               | 1.5             | 0.0             | 0.7             | 0.0               | ND            | ND            |
|       | 7274   | 725              | 700            | 824                          | 10.9              | 0.0           | 0.0               | 1.2               | 1.2               | 6.1             | 0.0             | 3.6             | 0.0               | ND            | ND            |
|       | 7275   | 700              | 675            | 818                          | 25.7              | 0.0           | 0.0               | 1.2               | 0.0               | 3.7             | 0.0             | 2.4             | 1.2               | ND            | ND            |
|       | 7276   | 675              | 650            | 534                          | 35.6              | 0.0           | 0.0               | 1.9               | 1.9               | 7.5             | 0.0             | 9.4             | 1.9               | ND            | ND            |
|       | 7277   | 650              | 625            | 984                          | 26.4              | 0.0           | 1.0               | 0.0               | 0.0               | 13.2            | 0.0             | 13.2            | 0.0               | ND            | ND            |
|       | 7278   | 625              | 600            | 1116                         | 53.8              | 0.0           | 0.0               | 0.9               | 0.9               | 12.5            | 2.7             | 19.7            | 3.6               | ND            | ND            |

Wishner Supplementary Table 1

| Tow # | Net ID | Start Depth<br>m | End Depth<br>m | Euc ine<br>Imm (C3,<br>C4F, C5F) | Euc ine<br>C4 M | Euc ine<br>C5 M | Euc spi<br>Adults | Gae kru<br>Adults | Gae Pse<br>Adults | Hal lon<br>Adults | Het lon<br>Adults | Lop fro<br>Adults | Luc flav<br>Adults | Luc huls<br>Adults | Luc oval<br>Adults |
|-------|--------|------------------|----------------|----------------------------------|-----------------|-----------------|-------------------|-------------------|-------------------|-------------------|-------------------|-------------------|--------------------|--------------------|--------------------|
| 607   | 6071   | 1200             | 900            | 23.0                             | 46.0            | 0.0             | 0.0               | ND                | ND                | ND                | ND                | ND                | ND                 | 0.0                | ND                 |
|       | 6072   | 900              | 750            | 0.0                              | 0.0             | 41.1            | 0.0               | ND                | ND                | ND                | ND                | ND                | ND                 | 288.0              | ND                 |
|       | 6073   | 750              | 550            | 110.4                            | 0.0             | 110.4           | 0.0               | ND                | ND                | ND                | ND                | ND                | ND                 | 0.0                | ND                 |
|       | 6074   | 550              | 350            | 23.6                             | 0.0             | 0.0             | 0.0               | ND                | ND                | ND                | ND                | ND                | ND                 | 0.0                | ND                 |
|       | 6075   | 350              | 150            | 61.2                             | 0.0             | 61.2            | 0.0               | ND                | ND                | ND                | ND                | ND                | ND                 | 0.0                | ND                 |
|       | 6076   | 150              | 80             | 804.3                            | 0.0             | 114.9           | 0.0               | ND                | ND                | ND                | ND                | ND                | ND                 | 0.0                | ND                 |
|       | 6077   | 80               | 20             | 37840.3                          | 7883.4          | 5255.6          | 0.0               | ND                | ND                | ND                | ND                | ND                | ND                 | 0.0                | ND                 |
|       | 6078   | 20               | 0              | 0.0                              | 0.0             | 0.0             | 0.0               | ND                | ND                | ND                | ND                | ND                | ND                 | 0.0                | ND                 |
| 615   | 6151   | 550              | 502            | 172.7                            | 0.0             | 0.0             | 0.0               | 0.0               | 0.0               | 57.6              | 345.4             | ND                | 0.0                | 0.0                | 0.0                |
|       | 6152   | 500              | 450            | 74.1                             | 0.0             | 44.5            | 0.0               | 0.0               | 0.0               | 14.8              | 311.3             | ND                | 0.0                | 0.0                | 0.0                |
|       | 6153   | 450              | 400            | 31.6                             | 0.0             | 47.5            | 0.0               | 0.0               | 0.0               | 0.0               | 110.8             | ND                | 0.0                | 0.0                | 0.0                |
|       | 6154   | 400              | 350            | 205.0                            | 0.0             | 93.2            | 0.0               | 0.0               | 0.0               | 0.0               | 0.0               | ND                | 0.0                | 0.0                | 0.0                |
|       | 6155   | 350              | 300            | 2611.4                           | 0.0             | 2176.1          | 0.0               | 0.0               | 0.0               | 435.2             | 0.0               | ND                | 0.0                | 0.0                | 0.0                |
|       | 6156   | 300              | 250            | 164.3                            | 0.0             | 164.3           | 0.0               | 0.0               | 0.0               | 0.0               | 0.0               | ND                | 0.0                | 0.0                | 0.0                |
|       | 6157   | 250              | 200            | 0.0                              | 0.0             | 0.0             | 0.0               | 0.0               | 0.0               | 993.6             | 0.0               | ND                | 0.0                | 0.0                | 0.0                |
|       | 6158   | 200              | 150            | 0.0                              | 0.0             | 691.3           | 0.0               | 0.0               | 0.0               | 0.0               | 0.0               | ND                | 0.0                | 0.0                | 0.0                |
| 616   | 6161   | 550              | 500            | 67.6                             | 0.0             | 67.6            | 0.0               | 0.0               | 0.0               | 0.0               | 315.4             | ND                | 0.0                | 0.0                | 0.0                |
|       | 6162   | 500              | 450            | 121.3                            | 0.0             | 24.3            | 0.0               | 0.0               | 0.0               | 24.3              | 266.8             | ND                | 0.0                | 0.0                | 0.0                |
|       | 6163   | 450              | 400            | 39.7                             | 0.0             | 26.5            | 0.0               | 0.0               | 0.0               | 0.0               | 304.3             | ND                | 0.0                | 0.0                | 0.0                |
|       | 6164   | 400              | 350            | 173.7                            | 10.9            | 108.6           | 0.0               | 0.0               | 0.0               | 10.9              | 21.7              | ND                | 0.0                | 0.0                | 0.0                |
|       | 6165   | 350              | 300            | 0.0                              | 0.0             | 2659.7          | 0.0               | 0.0               | 0.0               | 0.0               | 0.0               | ND                | 0.0                | 0.0                | 0.0                |
|       | 6166   | 300              | 250            | 282.7                            | 141.3           | 141.3           | 0.0               | 0.0               | 0.0               | 0.0               | 0.0               | ND                | 0.0                | 0.0                | 0.0                |
|       | 6167   | 250              | 200            | 0.0                              | 0.0             | 631.0           | 0.0               | 0.0               | 0.0               | 1262.0            | 0.0               | ND                | 0.0                | 0.0                | 0.0                |
|       | 6168   | 200              | 150            | 0.0                              | 0.0             | 0.0             | 0.0               | 0.0               | 0.0               | 745.5             | 0.0               | ND                | 0.0                | 0.0                | 0.0                |
| 617   | 6173   | 750              | 550            | 223.9                            | 32.0            | 96.0            | 0.0               | 0.0               | 0.0               | 0.0               | 1151.4            | ND                | 0.0                | 64.0               | 0.0                |
| 618   | 6181   | 150              | 100            | 175.0                            | 43.8            | 43.8            | 0.0               | 0.0               | 0.0               | 2209.8            | 0.0               | ND                | 943.0              | 0.0                | 0.0                |
|       | 6182   | 100              | 80             | 93.2                             | 0.0             | 93.2            | 0.0               | 0.0               | 0.0               | 1678.0            | 0.0               | ND                | 745.8              | 0.0                | 0.0                |
|       | 6183   | 80               | 60             | 366.8                            | 0.0             | 0.0             | 0.0               | 0.0               | 0.0               | 1467.0            | 0.0               | ND                | 0.0                | 0.0                | 0.0                |
|       | 6184   | 60               | 50             | 975.2                            | 139.3           | 139.3           | 0.0               | 0.0               | 0.0               | 2089.7            | 0.0               | ND                | 0.0                | 0.0                | 0.0                |
|       | 6185   | 50               | 40             | 2670.4                           | 0.0             | 593.4           | 0.0               | 0.0               | 0.0               | 593.4             | 0.0               | ND                | 0.0                | 0.0                | 0.0                |
|       | 6186   | 40               | 30             | 11788.9                          | 906.8           | 9068.4          | 0.0               | 0.0               | 0.0               | 0.0               | 0.0               | ND                | 0.0                | 0.0                | 0.0                |
|       | 6187   | 30               | 20             | 5607.9                           | 0.0             | 7477.2          | 0.0               | 0.0               | 0.0               | 0.0               | 0.0               | ND                | 0.0                | 0.0                | 0.0                |
|       | 6188   | 20               | 0              | 0.0                              | 0.0             | 0.0             | 0.0               | 0.0               | 0.0               | 0.0               | 0.0               | ND                | 0.0                | 0.0                | 0.0                |
| 619   | 6191   | 1200             | 1100           | 6.2                              | 0.0             | 6.2             | 0.0               | 0.0               | 0.0               | 12.4              | 12.4              | ND                | 12.4               | 6.2                | 74.6               |
|       | 6192   | 1100             | 1000           | 0.0                              | 0.0             | 0.0             | 0.0               | 0.0               | 9.9               | 19.8              | 9.9               | ND                | 0.0                | 0.0                | 59.4               |
|       | 6193   | 1000             | 950            | 0.0                              | 0.0             | 0.0             | 0.0               | 10.6              | 21.2              | 0.0               | 10.6              | ND                | 10.6               | 0.0                | 74.0               |
|       | 6194   | 950              | 900            | 0.0                              | 0.0             | 0.0             | 0.0               | 0.0               | 16.7              | 0.0               | 0.0               | ND                | 16.7               | 0.0                | 50.0               |
|       | 6195   | 900              | 850            | 0.0                              | 0.0             | 13.1            | 0.0               | 0.0               | 0.0               | 0.0               | 0.0               | ND                | 0.0                | 0.0                | 13.1               |
|       | 6196   | 850              | 800            | 109.6                            | 0.0             | 91.3            | 0.0               | 0.0               | 0.0               | 0.0               | 200.9             | ND                | 0.0                | 0.0                | 0.0                |
|       | 6197   | 800              | 750            | 25.9                             | 0.0             | 38.8            | 0.0               | 0.0               | 12.9              | 12.9              | 116.5             | ND                | 0.0                | 0.0                | 12.9               |
|       | 6198   | 750              | 700            | 0.0                              | 0.0             | 0.0             | 0.0               | 24.9              | 0.0               | 0.0               | 49.8              | ND                | 0.0                | 0.0                | 0.0                |
| 621   | 6211   | 150              | 100            | 0.0                              | 0.0             | 0.0             | 0.0               | 0.0               | 0.0               | 0.0               | 0.0               | ND                | 0.0                | 0.0                | 0.0                |
|       | 6212   | 100              | 80             | 0.0                              | 58.3            | 0.0             | 0.0               | 0.0               | 0.0               | 1515.5            | 0.0               | ND                | 0.0                | 0.0                | 0.0                |
|       | 6213   | 80               | 60             | 157.1                            | 0.0             | 0.0             | 0.0               | 0.0               | 0.0               | 314.3             | 0.0               | ND                | 0.0                | 0.0                | 0.0                |
|       | 6214   | 60               | 50             | 141.8                            | 0.0             | 0.0             | 0.0               | 0.0               | 0.0               | 851.0             | 0.0               | ND                | 283.7              | 0.0                | 0.0                |
|       | 6215   | 50               | 40             | 1645.5                           | 259.8           | 692.8           | 0.0               | 0.0               | 0.0               | 173.2             | 0.0               | ND                | 519.6              | 0.0                | 0.0                |
|       | 6216   | 40               | 30             | 735.6                            | 0.0             | 2206.9          | 0.0               | 0.0               | 0.0               | 0.0               | 0.0               | ND                | 5149.4             | 0.0                | 0.0                |
|       | 6217   | 30               | 20             | 0.0                              | 0.0             | 608.4           | 0.0               | 0.0               | 0.0               | 0.0               | 0.0               | ND                | 6692.8             | 0.0                | 0.0                |
|       | 6218   | 20               | 0              | 0.0                              | 0.0             | 0.0             | 0.0               | 0.0               | 0.0               | 0.0               | 0.0               | ND                | 2572.2             | 0.0                | 0.0                |
| 623   | 6231   | 775              | 733            | 92.6                             | 0.0             | 23.2            | 0.0               | 0.0               | 0.0               | 0.0               | 46.3              | ND                | 0.0                | 0.0                | 0.0                |
|       | 6232   | 733              | 700            | 126.4                            | 21.1            | 42.1            | 0.0               | 42.1              | 0.0               | 0.0               | 21.1              | ND                | 0.0                | 0.0                | 0.0                |
|       | 6233   | 700              | 675            | 0.0                              | 0.0             | 0.0             | 0.0               | 0.0               | 0.0               | 0.0               | 48.6              | ND                | 0.0                | 0.0                | 0.0                |
|       | 6234   | 675              | 650            | 0.0                              | 0.0             | 0.0             | 0.0               | 30.0              | 0.0               | 0.0               | 30.0              | ND                | 0.0                | 30.0               | 0.0                |
|       | 6235   | 650              | 625            | 0.0                              | 0.0             | 0.0             | 0.0               | 0.0               | 0.0               | 0.0               | 55.2              | ND                | 0.0                | 0.0                | 0.0                |
|       | 6236   | 625              | 600            | 130.5                            | 0.0             | 0.0             | 0.0               | 0.0               | 0.0               | 0.0               | 0.0               | ND                | 0.0                | 997.3              | 0.0                |
|       | 6237   | 600              | 575            | 334.7                            | 0.0             | 446.3           | 0.0               | 0.0               | 0.0               | 0.0               | 1004.2            | ND                | 0.0                | 0.0                | 0.0                |
|       | 6238   | 575              | 550            | 244.7                            | 0.0             | 489.5           | 0.0               | 0.0               | 0.0               | 0.0               | 122.4             | ND                | 0.0                | 122.4              | 0.0                |
| 626   | 6261   | 150              | 100            | 3459.5                           | 2749.8          | 266.1           | 0.0               | 0.0               | 0.0               | 0.0               | 0.0               | ND                | 88.7               | 0.0                | 0.0                |
|       | 6262   | 100              | 80             | 20166.8                          | 16608.0         | 2372.6          | 0.0               | 0.0               | 0.0               | 0.0               | 0.0               | ND                | 0.0                | 0.0                | 0.0                |
|       | 6263   | 80               | 60             | 104676.5                         | 26931.3         | 5081.4          | 0.0               | 0.0               | 0.0               | 508.1             | 0.0               | ND                | 0.0                | 0.0                | 0.0                |
|       | 6264   | 60               | 50             | 69847.0                          | 25928.1         | 10053.7         | 0.0               | 0.0               | 0.0               | 0.0               | 0.0               | ND                | 13757.8            | 0.0                | 0.0                |
|       | 6265   | 50               | 40             | 1268.0                           | 0.0             | 0.0             | 0.0               | 0.0               | 0.0               | 0.0               | 0.0               | ND                | 2535.9             | 0.0                | 0.0                |
|       | 6266   | 40               | 30             | 3366.2                           | 3366.2          | 1683.1          | 0.0               | 0.0               | 0.0               | 0.0               | 0.0               | ND                | 0.0                | 0.0                | 0.0                |
|       | 6267   | 30               | 20             | 778.6                            | 0.0             | 0.0             | 0.0               | 0.0               | 0.0               | 0.0               | 0.0               | ND                | 0.0                | 0.0                | 0.0                |
|       | 6268   | 20               | 0              | 2134.8                           | 0.0             | 0.0             | 0.0               | 0.0               | 0.0               | 0.0               | 0.0               | ND                | 0.0                | 0.0                | 0.0                |
| 628   | 6281   | 550              | 500            | 454.7                            | 404.2           | 202.1           | 0.0               | ND                | ND                | ND                | ND                | ND                | ND                 | ND                 | ND                 |
|       | 6282   | 500              | 450            | 255.1                            | 204.1           | 153.1           | 0.0               | ND                | ND                | ND                | ND                | ND                | ND                 | ND                 | ND                 |
|       | 6283   | 450              | 400            | 513.2                            | 81.0            | 108.0           | 0.0               | ND                | ND                | ND                | ND                | ND                | ND                 | ND                 | ND                 |
|       | 6284   | 400              | 350            | 586.2                            | 195.4           | 97.7            | 0.0               | ND                | ND                | ND                | ND                | ND                | ND                 | 0.0                | ND                 |

Wishner Supplementary Table 1

| Tow # | Net ID | Start Depth<br>m | End Depth<br>m | Euc ine<br>Imm (C3,<br>C4F, C5F) | Euc ine<br>C4 M | Euc ine<br>C5 M | Euc spi<br>Adults | Gae kru<br>Adults | Gae Pse<br>Adults | Hal lon<br>Adults | Het lon<br>Adults | Lop fro<br>Adults | Luc flav<br>Adults | Luc huls<br>Adults | Luc oval<br>Adults |
|-------|--------|------------------|----------------|----------------------------------|-----------------|-----------------|-------------------|-------------------|-------------------|-------------------|-------------------|-------------------|--------------------|--------------------|--------------------|
|       | 6286   | 300              | 250            | 1476.8                           | 1265.9          | 316.5           | 0.0               | ND                | ND                | ND                | ND                | ND                | ND                 | 0.0                | ND                 |
|       | 6287   | 250              | 200            | 1870.4                           | 1741.4          | 258.0           | 0.0               | ND                | ND                | ND                | ND                | ND                | ND                 | 0.0                | ND                 |
|       | 6288   | 200              | 150            | 1379.5                           | 2197.0          | 408.7           | 0.0               | 0.0               | 0.0               | 0.0               | 0.0               | ND                | 0.0                | 0.0                | 0.0                |
| 630   | 6301   | 550              | 500            | 398.5                            | 148.0           | 148.0           | 0.0               | ND                | ND                | ND                | 45.5              | ND                | ND                 | 0.0                | ND                 |
|       | 6302   | 500              | 450            | 376.2                            | 167.2           | 177.6           | 0.0               | ND                | ND                | ND                | ND                | ND                | ND                 | 0.0                | ND                 |
|       | 6303   | 450              | 400            | 349.6                            | 122.4           | 69.9            | 0.0               | ND                | ND                | ND                | ND                | ND                | ND                 | 0.0                | ND                 |
|       | 6304   | 400              | 350            | 476.6                            | 108.3           | 108.3           | 0.0               | ND                | ND                | ND                | ND                | ND                | ND                 | 0.0                | ND                 |
|       | 6305   | 350              | 300            | 436.8                            | 364.0           | 194.1           | 0.0               | ND                | ND                | ND                | ND                | ND                | ND                 | 0.0                | ND                 |
|       | 6306   | 300              | 250            | 1069.6                           | 411.4           | 137.1           | 0.0               | ND                | ND                | ND                | ND                | ND                | ND                 | 0.0                | ND                 |
|       | 6307   | 250              | 200            | 1299.1                           | 1215.3          | 125.7           | 0.0               | ND                | ND                | ND                | ND                | ND                | 41.9               | 0.0                | ND                 |
|       | 6308   | 200              | 150            | 1273.4                           | 1400.7          | 286.5           | 0.0               | 0.0               | 0.0               | 0.0               | 0.0               | ND                | 31.8               | 0.0                | 0.0                |
| 631   | 6311   | 1000             | 900            | 30.3                             | 0.0             | 0.0             | 0.0               | 0.0               | 0.0               | 0.0               | 37.9              | ND                | 0.0                | 7.6                | 63.2               |
|       | 6312   | 900              | 875            | 102.7                            | 0.0             | 0.0             | 0.0               | 0.0               | 0.0               | 0.0               | 0.0               | ND                | 0.0                | 0.0                | 0.0                |
|       | 6313   | 875              | 850            | 10.3                             | 0.0             | 10.3            | 0.0               | 0.0               | 0.0               | 0.0               | 0.0               | ND                | 0.0                | 206.7              | 0.0                |
|       | 6314   | 850              | 825            | 148.7                            | 0.0             | 148.7           | 0.0               | 0.0               | 0.0               | 123.9             | 0.0               | 0.0               | 0.0                | 495.7              | 0.0                |
|       | 6315   | 825              | 800            | 8066.3                           | 260.2           | 7545.9          | 0.0               | 0.0               | 0.0               | 0.0               | 1040.8            | 0.0               | 0.0                | 780.6              | 0.0                |
|       | 6316   | 800              | 775            | 19621.9                          | 4905.5          | 10138.0         | 0.0               | 0.0               | 0.0               | 0.0               | 654.1             | 0.0               | 0.0                | 0.0                | 0.0                |
|       | 6317   | 775              | 700            | 785.4                            | 363.1           | 414.9           | 0.0               | 0.0               | 0.0               | 0.0               | 74.1              | ND                | 0.0                | 7.4                | 0.0                |
|       | 6318   | 700              | 550            | 453.4                            | 365.9           | 198.9           | 0.0               | 0.0               | 0.0               | 0.0               | 39.8              | ND                | 0.0                | 8.0                | 0.0                |
| 632   | 6321   | 1000             | 900            | 189.6                            | 50.6            | 0.0             | 0.0               | ND                | ND                | ND                | ND                | ND                | ND                 | ND                 | ND                 |
|       | 6322   | 900              | 875            | 129.0                            | 64.5            | 25.8            | 0.0               | ND                | ND                | ND                | ND                | ND                | ND                 | ND                 | ND                 |
|       | 6323   | 875              | 850            | 32.0                             | 0.0             | 0.0             | 0.0               | ND                | ND                | ND                | ND                | ND                | ND                 | ND                 | ND                 |
|       | 6324   | 850              | 825            | 969.8                            | 147.3           | 540.1           | 0.0               | ND                | ND                | ND                | ND                | ND                | ND                 | ND                 | ND                 |
|       | 6325   | 825              | 800            | 15002.6                          | 2430.6          | 11817.7         | 0.0               | ND                | ND                | ND                | ND                | ND                | ND                 | ND                 | ND                 |
|       | 6326   | 800              | 775            | 7816.8                           | 1954.2          | 3375.4          | 0.0               | ND                | ND                | ND                | ND                | ND                | ND                 | ND                 | ND                 |
|       | 6327   | 775              | 700            | 741.7                            | 385.1           | 199.7           | 0.0               | ND                | ND                | ND                | ND                | ND                | ND                 | ND                 | ND                 |
|       | 6328   | 700              | 550            | 662.6                            | 323.2           | 113.1           | 0.0               | ND                | ND                | ND                | ND                | ND                | ND                 | ND                 | ND                 |
| 633   | 6331   | 150              | 100            | 4213.1                           | 3131.4          | 512.4           | 0.0               | 0.0               | 0.0               | 0.0               | 0.0               | ND                | 170.8              | 0.0                | 0.0                |
|       | 6332   | 100              | 80             | 65975.4                          | 18411.7         | 6137.2          | 0.0               | 0.0               | 0.0               | 0.0               | 0.0               | ND                | 0.0                | 0.0                | 0.0                |
|       | 6333   | 80               | 60             | 200504.4                         | 76353.1         | 11173.6         | 0.0               | 0.0               | 0.0               | 620.8             | 0.0               | ND                | 0.0                | 0.0                | 0.0                |
|       | 6334   | 60               | 50             | 6268.4                           | 1880.5          | 1253.7          | 0.0               | 0.0               | 0.0               | 0.0               | 0.0               | ND                | 2507.3             | 0.0                | 0.0                |
|       | 6335   | 50               | 40             | 11095.7                          | 1775.3          | 11539.5         | 0.0               | 0.0               | 0.0               | 0.0               | 0.0               | ND                | 0.0                | 0.0                | 0.0                |
|       | 6336   | 40               | 30             | 4547.6                           | 1819.0          | 1212.7          | 0.0               | 0.0               | 0.0               | 0.0               | 0.0               | ND                | 0.0                | 0.0                | 0.0                |
|       | 6337   | 30               | 20             | 4326.8                           | 1081.7          | 0.0             | 0.0               | 0.0               | 0.0               | 0.0               | 0.0               | ND                | 2884.5             | 0.0                | 0.0                |
|       | 6338   | 20               | 0              | 0.0                              | 0.0             | 0.0             | 0.0               | 0.0               | 0.0               | 0.0               | 0.0               | ND                | 7174.9             | 0.0                | 0.0                |
| 635   | 6351   | 150              | 100            | 115.8                            | 57.9            | 173.8           | 0.0               | ND                | ND                | ND                | ND                | ND                | ND                 | ND                 | ND                 |
|       | 6352   | 100              | 80             | 716.7                            | 0.0             | 119.4           | 0.0               | ND                | ND                | ND                | ND                | ND                | ND                 | ND                 | ND                 |
|       | 6353   | 80               | 60             | 2104.6                           | 0.0             | 191.3           | 0.0               | ND                | ND                | ND                | ND                | ND                | ND                 | ND                 | ND                 |
|       | 6354   | 60               | 50             | 3027.4                           | 0.0             | 302.7           | 0.0               | ND                | ND                | ND                | ND                | ND                | ND                 | ND                 | ND                 |
|       | 6355   | 50               | 40             | 3800.5                           | 380.0           | 1900.2          | 0.0               | ND                | ND                | ND                | ND                | ND                | ND                 | ND                 | ND                 |
|       | 6356   | 40               | 30             | 651.7                            | 0.0             | 0.0             | 0.0               | ND                | ND                | ND                | ND                | ND                | ND                 | ND                 | ND                 |
|       | 6357   | 30               | 20             | 0.0                              | 0.0             | 0.0             | 0.0               | ND                | ND                | ND                | ND                | ND                | ND                 | ND                 | ND                 |
|       | 6358   | 20               | 0              | 0.0                              | 0.0             | 0.0             | 0.0               | ND                | ND                | ND                | ND                | ND                | ND                 | ND                 | ND                 |
| 636   | 6361   | 1000             | 900            | 93.9                             | 4.1             | 40.8            | 0.0               | ND                | ND                | ND                | ND                | ND                | ND                 | ND                 | ND                 |
|       | 6362   | 900              | 750            | 46.5                             | 0.0             | 0.0             | 0.0               | ND                | ND                | ND                | ND                | ND                | ND                 | ND                 | ND                 |
|       | 6363   | 750              | 650            | 0.0                              | 0.0             | 17.1            | 0.0               | ND                | ND                | ND                | ND                | ND                | ND                 | ND                 | ND                 |
|       | 6364   | 650              | 625            | 66.6                             | 16.6            | 0.0             | 0.0               | ND                | ND                | ND                | ND                | ND                | ND                 | ND                 | ND                 |
|       | 6365   | 625              | 600            | 232.8                            | 0.0             | 46.6            | 0.0               | ND                | ND                | ND                | ND                | ND                | ND                 | ND                 | ND                 |
|       | 6366   | 600              | 575            | 258.5                            | 0.0             | 147.7           | 0.0               | ND                | ND                | ND                | ND                | ND                | ND                 | ND                 | ND                 |
|       | 6367   | 575              | 550            | 3527.3                           | 130.6           | 1567.7          | 0.0               | ND                | ND                | ND                | ND                | ND                | ND                 | ND                 | ND                 |
|       | 6368   | 550              | 525            | 19372.0                          | 722.8           | 13155.6         | 0.0               | ND                | ND                | ND                | ND                | ND                | ND                 | ND                 | ND                 |
| 637   | 6371   | 550              | 500            | 23090.8                          | 1154.5          | 20396.9         | 0.0               | ND                | ND                | ND                | ND                | ND                | ND                 | ND                 | ND                 |
|       | 6372   | 500              | 450            | 296.2                            | 0.0             | 211.6           | 0.0               | ND                | ND                | ND                | ND                | ND                | ND                 | ND                 | ND                 |
|       | 6373   | 450              | 400            | 209.8                            | 0.0             | 192.3           | 0.0               | ND                | ND                | ND                | ND                | ND                | ND                 | ND                 | ND                 |
|       | 6374   | 400              | 350            | 127.8                            | 0.0             | 85.2            | 0.0               | ND                | ND                | ND                | ND                | ND                | ND                 | ND                 | ND                 |
|       | 6375   | 350              | 300            | 350.6                            | 0.0             | 73.8            | 0.0               | ND                | ND                | ND                | ND                | ND                | ND                 | ND                 | ND                 |
|       | 6376   | 300              | 250            | 1100.4                           | 163.0           | 1100.4          | 0.0               | ND                | ND                | ND                | ND                | ND                | ND                 | ND                 | ND                 |
|       | 6377   | 250              | 200            | 1550.7                           | 58.9            | 903.0           | 0.0               | ND                | ND                | ND                | ND                | ND                | ND                 | ND                 | ND                 |
|       | 6378   | 200              | 150            | 99.1                             | 0.0             | 396.6           | 0.0               | ND                | ND                | ND                | ND                | ND                | ND                 | ND                 | ND                 |
| 638   | 6381   | 150              | 100            | 132.2                            | 66.1            | 0.0             | 0.0               | ND                | ND                | ND                | ND                | ND                | ND                 | ND                 | ND                 |
|       | 6382   | 100              | 80             | 221.7                            | 110.8           | 0.0             | 0.0               | ND                | ND                | ND                | ND                | ND                | ND                 | ND                 | ND                 |
|       | 6383   | 80               | 60             | 1068.6                           | 194.3           | 97.1            | 0.0               | ND                | ND                | ND                | ND                | ND                | ND                 | ND                 | ND                 |
|       | 6384   | 60               | 50             | 2060.1                           | 171.7           | 0.0             | 0.0               | ND                | ND                | ND                | ND                | ND                | ND                 | ND                 | ND                 |
|       | 6385   | 50               | 40             | 1789.4                           | 0.0             | 1192.9          | 0.0               | ND                | ND                | ND                | ND                | ND                | ND                 | ND                 | ND                 |
|       | 6386   | 40               | 30             | 6457.8                           | 679.8           | 5438.1          | 0.0               | ND                | ND                | ND                | ND                | ND                | ND                 | ND                 | ND                 |
|       | 6387   | 30               | 20             | 2146.8                           | 0.0             | 1073.4          | 0.0               | ND                | ND                | ND                | ND                | ND                | ND                 | ND                 | ND                 |
|       | 6388   | 20               | 0              | 0.0                              | 0.0             | 0.0             | 0.0               | ND                | ND                | ND                | ND                | ND                | ND                 | ND                 | ND                 |
| 640   | 6401   | 1000             | 900            | 31.9                             | 0.0             | 21.3            | 0.0               | ND                | ND                | ND                | ND                | ND                | ND                 | ND                 | ND                 |
|       | 6402   | 900              | 750            |                                  | 0.0             | 0.0             | 0.0               | ND                | ND                | ND                | ND                | ND                | ND                 | ND                 | ND                 |

Wishner Supplementary Table 1

| Tow # | Net ID | Start Depth<br>m | End Depth<br>m | Euc ine<br>Imm (C3,<br>C4F, C5F) | Euc ine<br>C4 M | Euc ine<br>C5 M | Euc spi<br>Adults | Gae kru<br>Adults | Gae Pse<br>Adults | Hal lon<br>Adults | Het lon<br>Adults | Lop fro<br>Adults | Luc flav<br>Adults | Luc huls<br>Adults | Luc oval<br>Adults |     |
|-------|--------|------------------|----------------|----------------------------------|-----------------|-----------------|-------------------|-------------------|-------------------|-------------------|-------------------|-------------------|--------------------|--------------------|--------------------|-----|
|       | 6403   | 750              | 650            | 0.0                              | 0.0             | 0.0             | 0.0               | ND                | ND                | ND                | ND                | ND                | ND                 | ND                 | ND                 | ND  |
|       | 6404   | 650              | 625            | 0.0                              | 0.0             | 19.2            | 0.0               | ND                | ND                | ND                | ND                | ND                | ND                 | ND                 | ND                 | ND  |
|       | 6405   | 625              | 600            | 42.4                             | 0.0             | 21.2            | 0.0               | ND                | ND                | ND                | ND                | ND                | ND                 | ND                 | ND                 | ND  |
|       | 6406   | 600              | 575            | 2165.8                           | 270.7           | 812.2           | 0.0               | ND                | ND                | ND                | ND                | ND                | ND                 | ND                 | ND                 | ND  |
|       | 6407   | 575              | 550            | 6783.5                           | 260.9           | 3652.7          | 0.0               | ND                | ND                | ND                | ND                | ND                | ND                 | ND                 | ND                 | ND  |
| 641   | 6413   | 500              | 450            | 188.1                            | 0.0             | 110.7           | 0.0               | ND                | ND                | ND                | ND                | ND                | ND                 | ND                 | ND                 | ND  |
|       | 6414   | 450              | 400            | 115.2                            | 0.0             | 115.2           | 0.0               | ND                | ND                | ND                | ND                | ND                | ND                 | ND                 | ND                 | ND  |
|       | 6415   | 400              | 350            | 148.3                            | 0.0             | 69.2            | 0.0               | ND                | ND                | ND                | ND                | ND                | ND                 | ND                 | ND                 | ND  |
|       | 6416   | 350              | 300            | 273.8                            | 0.0             | 136.9           | 0.0               | ND                | ND                | ND                | ND                | ND                | ND                 | ND                 | ND                 | ND  |
|       | 6417   | 300              | 250            | 1674.5                           | 0.0             | 1339.6          | 0.0               | ND                | ND                | ND                | ND                | ND                | ND                 | ND                 | ND                 | ND  |
|       | 6418   | 250              | 200            | 920.2                            | 153.4           | 1073.6          | 0.0               | ND                | ND                | ND                | ND                | ND                | ND                 | ND                 | ND                 | ND  |
| 707   | 7071   | 450              | 400            | 34.5                             | 7.7             | 30.7            | 11.5              | 0.0               | 0.0               | 0.0               | 3.8               | 0.0               | 0.0                | 0.0                | 0.0                | 0.0 |
|       | 7072   | 400              | 350            | 6.0                              | 1.7             | 2.6             | 2.6               | 0.0               | 0.0               | 0.0               | 2.6               | 0.0               | 0.0                | 0.0                | 0.0                | 0.0 |
|       | 7073   | 350              | 300            | 3.2                              | 0.0             | 0.0             | 0.0               | 0.0               | 0.0               | 0.0               | 0.0               | 0.0               | 0.0                | 0.0                | 0.0                | 0.0 |
|       | 7074   | 300              | 250            | 0.0                              | 0.0             | 0.0             | 0.0               | 0.0               | 0.0               | 83.2              | 0.0               | 0.0               | 0.0                | 0.0                | 0.0                | 0.0 |
|       | 7075   | 250              | 200            | 0.0                              | 0.0             | 0.0             | 0.0               | 0.0               | 0.0               | 57.1              | 14.0              | 0.0               | 0.0                | 0.0                | 0.0                | 0.0 |
|       | 7076   | 200              | 150            | 0.0                              | 0.0             | 0.0             | 1.1               | 0.0               | 0.0               | 7.6               | 17.4              | 1.1               | 0.0                | 0.0                | 0.0                | 0.0 |
|       | 7077   | 150              | 100            | 0.0                              | 0.0             | 0.0             | 0.0               | 0.0               | 0.0               | 61.9              | 46.4              | 6.8               | 15.5               | 0.0                | 0.0                | 0.0 |
|       | 7078   | 100              | 0              | 0.0                              | 0.0             | 0.0             | 2.4               | 0.0               | 0.0               | 24.0              | 0.0               | 2.4               | 120.0              | 0.0                | 0.0                | 0.0 |
| 708   | 7081   | 450              | 400            | 2.5                              | 1.3             | 1.3             | 3.8               | 11.3              | 0.0               | 0.0               | 0.0               | 18.8              | 0.0                | 1.3                | 0.0                | 0.0 |
|       | 7082   | 400              | 350            | 0.0                              | 0.0             | 0.0             | 0.0               | 0.0               | 0.0               | 0.0               | 0.0               | 0.0               | 0.0                | 0.0                | 0.0                | 0.0 |
|       | 7083   | 350              | 300            | 0.0                              | 0.9             | 0.0             | 0.0               | 0.0               | 0.0               | 0.0               | 0.0               | 0.0               | 1.8                | 0.0                | 0.0                | 0.0 |
|       | 7084   | 300              | 250            | 0.0                              | 0.0             | 0.0             | 0.0               | 0.0               | 0.0               | 26.7              | 8.9               | 0.0               | 8.9                | 0.0                | 0.0                | 0.0 |
|       | 7085   | 250              | 200            | 0.0                              | 0.0             | 0.0             | 0.0               | 0.0               | 0.0               | 0.0               | 10.9              | 0.0               | 10.9               | 0.0                | 0.0                | 0.0 |
|       | 7086   | 200              | 150            | 0.0                              | 0.0             | 0.0             | 0.0               | 0.0               | 0.0               | 0.7               | 4.0               | 0.0               | 2.0                | 0.0                | 0.0                | 0.0 |
|       | 7087   | 150              | 100            | 0.0                              | 0.0             | 0.0             | 4.8               | 0.0               | 0.0               | 7.2               | 0.0               | 0.0               | 7.2                | 0.0                | 0.0                | 0.0 |
|       | 7088   | 100              | 0              | 0.0                              | 0.0             | 0.0             | 0.0               | 0.0               | 0.0               | 0.0               | 0.0               | 0.0               | 144.8              | 0.0                | 0.0                | 0.0 |
| 709   | 7091   | 1000             | 850            | 0.0                              | 0.0             | 0.0             | 0.0               | 0.0               | 0.0               | 0.0               | 0.4               | 0.0               | 0.0                | 0.0                | 0.0                | 0.0 |
|       | 7092   | 850              | 800            | 0.0                              | 0.0             | 0.0             | 0.0               | 0.0               | 0.8               | 0.0               | 1.6               | 0.0               | 0.0                | 0.0                | 0.0                | 1.6 |
|       | 7093   | 800              | 750            | 0.5                              | 0.0             | 0.0             | 0.0               | 0.5               | 0.5               | 0.0               | 1.5               | 0.0               | 0.0                | 0.5                | 0.5                | 0.5 |
|       | 7094   | 750              | 700            | 0.0                              | 0.0             | 0.0             | 0.0               | 1.9               | 0.0               | 0.0               | 0.9               | 0.9               | 0.0                | 1.9                | 1.9                | 1.9 |
|       | 7095   | 700              | 650            | 0.4                              | 0.4             | 0.0             | 0.0               | 2.2               | 0.0               | 0.0               | 0.0               | 0.0               | 0.0                | 3.6                | 0.4                | 0.4 |
|       | 7096   | 650              | 600            | 0.6                              | 0.0             | 0.6             | 0.6               | 0.0               | 0.0               | 0.0               | 0.0               | 0.0               | 0.0                | 8.3                | 0.0                | 0.0 |
|       | 7097   | 600              | 550            | 1.2                              | 1.2             | 0.6             | 0.0               | 0.0               | 0.0               | 0.0               | 1.2               | 0.0               | 0.0                | 14.8               | 0.0                | 0.0 |
|       | 7098   | 550              | 450            | 8.9                              | 0.0             | 3.0             | 0.0               | 0.0               | 0.0               | 0.0               | 3.0               | 0.0               | 0.0                | 91.9               | 0.0                | 0.0 |
| 710   | 7101   | 1000             | 850            | 0.0                              | 0.0             | 0.0             | 0.0               | 0.0               | 0.6               | 0.0               | 0.6               | 0.0               | 0.0                | 0.6                | 0.3                | 0.3 |
|       | 7102   | 850              | 800            | 0.0                              | 0.0             | 0.0             | 0.0               | 0.5               | 1.0               | 0.0               | 2.1               | 0.0               | 0.0                | 0.5                | 0.5                | 0.5 |
|       | 7103   | 800              | 750            | 1.0                              | 0.0             | 0.0             | 1.0               | 0.0               | 0.0               | 0.0               | 0.0               | 0.0               | 0.0                | 0.0                | 1.0                | 1.0 |
|       | 7104   | 750              | 700            | 0.0                              | 0.0             | 0.0             | 0.0               | 0.6               | 0.6               | 0.0               | 0.6               | 0.0               | 0.0                | 2.9                | 1.2                | 1.2 |
|       | 7105   | 700              | 650            | 0.0                              | 0.0             | 0.0             | 0.0               | 3.6               | 0.0               | 0.0               | 0.0               | 0.0               | 0.0                | 2.7                | 0.0                | 0.0 |
|       | 7106   | 650              | 600            | 1.3                              | 0.0             | 0.0             | 0.0               | 0.0               | 0.0               | 0.0               | 0.0               | 0.0               | 0.0                | 10.3               | 0.0                | 0.0 |
|       | 7107   | 600              | 550            | 1.0                              | 1.0             | 1.0             | 1.0               | 0.0               | 0.0               | 2.1               | 0.0               | 0.0               | 1.0                | 26.7               | 0.0                | 0.0 |
|       | 7108   | 550              | 450            | 2.1                              | 0.0             | 2.1             | 6.4               | 0.0               | 0.0               | 0.0               | 0.0               | 0.0               | 0.0                | 82.8               | 0.0                | 0.0 |
| 711   | 7111   | 468              | 460            | 3.0                              | 1.0             | 1.0             | 0.0               | 0.0               | 0.0               | 0.0               | 0.0               | 63.7              | 0.0                | 0.0                | 0.0                | 0.0 |
|       | 7112   | 460              | 463            | 12.7                             | 0.0             | 3.6             | 5.4               | 0.0               | 0.0               | 0.0               | 0.0               | 41.6              | 0.0                | 0.0                | 0.0                | 0.0 |
|       | 7113   | 463              | 384            |                                  |                 |                 |                   |                   |                   |                   |                   |                   |                    |                    |                    |     |
|       | 7114   | 384              | 390            | 0.0                              | 0.0             | 0.0             | 0.0               | 0.0               | 0.0               | 0.0               | 0.0               | 0.0               | 0.0                | 0.0                | 0.0                | 0.0 |
|       | 7115   | 390              | 390            | 1.1                              | 0.0             | 0.0             | 1.1               | 0.0               | 0.0               | 0.0               | 0.0               | 0.0               | 0.0                | 0.0                | 0.0                | 0.0 |
|       | 7116   | 390              | 367            |                                  |                 |                 |                   |                   |                   |                   |                   |                   |                    |                    |                    |     |
|       | 7117   | 367              | 385            | 0.0                              | 0.0             | 0.0             | 1.1               | 0.0               | 0.0               | 0.0               | 0.0               | 0.0               | 0.0                | 0.0                | 0.0                | 0.0 |
|       | 7118   | 385              | 348            | 0.0                              | 0.0             | 0.0             | 0.0               | 0.0               | 0.0               | 0.0               | 3.0               | 0.0               | 1.0                | 0.0                | 0.0                | 0.0 |
| 713   | 7131   | 800              | 775            | 0.0                              | 0.0             | 0.0             | 0.0               | 0.0               | 0.0               | 0.0               | 0.0               | 0.0               | 0.0                | 1.0                | 0.0                | 0.0 |
|       | 7132   | 775              | 750            | 0.0                              | 0.0             | 0.0             | 0.0               | 1.0               | 0.0               | 0.0               | 0.0               | 0.0               | 0.0                | 0.0                | 0.0                | 0.0 |
|       | 7133   | 750              | 725            | 0.0                              | 0.0             | 0.0             | 0.0               | 0.8               | 0.0               | 0.0               | 0.0               | 0.0               | 0.0                | 0.0                | 0.0                | 0.0 |
|       | 7134   | 725              | 700            | 0.0                              | 0.0             | 0.0             | 0.0               | 0.6               | 0.0               | 0.0               | 0.0               | 0.0               | 0.0                | 1.2                | 0.0                | 0.0 |
|       | 7135   | 700              | 675            | 0.0                              | 0.0             | 0.0             | 0.9               | 0.9               | 0.0               | 0.0               | 0.0               | 0.0               | 0.0                | 3.6                | 0.0                | 0.0 |
|       | 7136   | 675              | 650            | 0.0                              | 0.0             | 0.0             | 0.0               | 0.0               | 0.0               | 0.0               | 0.0               | 0.0               | 0.0                | 5.7                | 0.0                | 0.0 |
|       | 7137   | 650              | 625            | 0.0                              | 0.0             | 0.0             | 0.0               | 1.0               | 0.0               | 0.0               | 0.0               | 0.0               | 0.0                | 11.7               | 0.0                | 0.0 |
|       | 7138   | 625              | 600            | 0.0                              | 0.0             | 0.0             | 0.0               | 0.0               | 0.0               | 0.0               | 0.0               | 0.0               | 0.0                | 9.5                | 0.0                | 0.0 |
| 716   | 7161   | 1000             | 800            | 0.0                              | 0.0             | 0.0             | 0.0               | 0.0               | 1.9               | 0.0               | 0.0               | 0.0               | 0.0                | 1.1                | 0.0                | 0.0 |
|       | 7162   | 800              | 700            | 0.0                              | 0.0             | 0.0             | 1.1               | 1.1               | 0.0               | 0.0               | 0.0               | 1.1               | 0.0                | 18.8               | 0.0                | 0.0 |
|       | 7163   | 700              | 600            | 0.9                              | 0.0             | 3.7             | 0.0               | 0.0               | 0.0               | 0.0               | 1.9               | 0.0               | 0.0                | 18.7               | 0.0                | 0.0 |
|       | 7164   | 600              | 500            | 29.3                             | 0.0             | 29.3            | 1.0               | 0.0               | 0.0               | 0.0               | 5.2               | 0.0               | 0.0                | 24.1               | 0.0                | 0.0 |
|       | 7165   | 500              | 400            | 20.2                             | 0.0             | 18.2            | 3.0               | 0.0               | 0.0               | 0.0               | 1.0               | 0.0               | 0.0                | 2.0                | 0.0                | 0.0 |
|       | 7166   | 400              | 300            | 18.1                             | 0.0             | 9.7             | 1.2               | 0.0               | 0.0               | 0.0               | 7.3               | 0.0               | 1.2                | 0.0                | 0.0                | 0.0 |
|       | 7167   | 300              | 200            | 1.3                              | 0.0             | 0.0             | 0.0               | 0.0               | 0.0               | 2.6               | 7.7               | 2.6               | 0.0                | 1.3                | 0.0                | 0.0 |
|       | 7168   | 200              | 100            | 0.0                              | 0.0             | 0.0             | 0.0               | 0.0               | 0.0               | 0.0               | 0.0               | 7.7               | 0.0                | 0.0                | 0.0                | 0.0 |
|       | 7169   | 100              | 0              | 0.0                              | 0.0             | 0.0             | 0.0               | 0.0               | 0.0               | 4.1               | 0.0               | 0.0               | 4.1                | 4.1                | 0.0                | 0.0 |
| 718   | 7181   | 650              | 600            | 0.0                              | 0.0             | 0.0             | 0.0               | 0.0               | 0.0               | 0.0               | 0.0               | 0.0               | 0.0                | 62.5               | 0.0                | 0.0 |
|       | 7182   | 600              | 550            | 0.8                              | 0.0             | 0.8             | 1.5               | 0.0               | 0.0               | 0.0               | 0.0               | 0.0               | 0.0                | 29.4               | 0.0                | 0.0 |
|       | 7183   | 550              | 500            | 1.5                              | 0.0             | 0.0             | 1.5               | 0.0               | 0.0               | 0.0               | 1.5               | 0.7               | 0.0                | 37.0               | 0.0                | 0.0 |

Wishner Supplementary Table 1

| Tow # | Net ID | Start Depth<br>m | End Depth<br>m | Euc ine<br>Imm (C3,<br>C4F, C5F) | Euc ine<br>C4 M | Euc ine<br>C5 M | Euc spi<br>Adults | Gae kru<br>Adults | Gae Pse<br>Adults | Hal lon<br>Adults | Het lon<br>Adults | Lop fro<br>Adults | Luc flav<br>Adults | Luc huls<br>Adults | Luc oval<br>Adults |
|-------|--------|------------------|----------------|----------------------------------|-----------------|-----------------|-------------------|-------------------|-------------------|-------------------|-------------------|-------------------|--------------------|--------------------|--------------------|
|       | 7184   | 500              | 475            | 8.2                              | 0.0             | 3.7             | 4.6               | 0.9               | 0.0               | 0.0               | 1.8               | 6.4               | 0.0                | 0.0                | 0.0                |
|       | 7185   | 475              | 450            | 8.0                              | 0.0             | 5.3             | 1.8               | 0.0               | 0.0               | 0.0               | 0.9               | 16.8              | 0.0                | 0.0                | 0.0                |
|       | 7186   | 450              | 425            | 2.6                              | 0.0             | 0.9             | 0.0               | 0.0               | 0.0               | 0.0               | 0.0               | 44.4              | 0.0                | 0.0                | 0.0                |
|       | 7187   | 425              | 400            | 0.9                              | 0.0             | 0.0             | 0.0               | 0.0               | 0.0               | 1.7               | 0.0               | 3.5               | 0.0                | 5.2                | 0.0                |
|       | 7188   | 400              | 350            | 0.0                              | 0.0             | 0.7             | 0.0               | 0.0               | 0.0               | 0.7               | 0.0               | 0.0               | 0.0                | 0.0                | 0.0                |
| 719   | 7191   | 650              | 600            | 0.0                              | 0.0             | 0.0             | 0.0               | 0.0               | 0.0               | 0.0               | 0.0               | 1.0               | 0.0                | 41.3               | 0.0                |
|       | 7192   | 600              | 550            | 1.8                              | 0.0             | 0.9             | 0.9               | 0.0               | 0.0               | 0.0               | 0.9               | 0.0               | 0.0                | 64.8               | 0.0                |
|       | 7193   | 550              | 500            | 20.0                             | 0.0             | 10.4            | 0.0               | 0.0               | 0.0               | 0.0               | 2.4               | 0.0               | 0.0                | 2.4                | 0.0                |
|       | 7194   | 500              | 475            | 54.1                             | 5.9             | 33.8            | 0.0               | 0.0               | 0.0               | 0.0               | 20.3              | 0.8               | 0.0                | 0.0                | 0.0                |
|       | 7195   | 475              | 450            | 39.1                             | 2.8             | 27.9            | 0.0               | 0.0               | 0.0               | 0.9               | 12.1              | 0.0               | 0.0                | 0.9                | 0.0                |
|       | 7196   | 450              | 425            | 13.5                             | 1.0             | 8.3             | 1.0               | 0.0               | 0.0               | 0.0               | 11.4              | 4.1               | 0.0                | 0.0                | 0.0                |
|       | 7197   | 425              | 400            | 1.8                              | 0.0             | 1.8             | 0.0               | 0.0               | 0.0               | 0.0               | 0.0               | 0.0               | 0.0                | 0.0                | 0.0                |
|       | 7198   | 400              | 350            | 0.8                              | 0.0             | 1.5             | 0.0               | 0.0               | 0.0               | 0.0               | 0.0               | 0.0               | 0.0                | 0.0                | 0.0                |
| 720   | 7201   | 650              | 600            | 2.4                              | 0.0             | 1.2             | 0.0               | 0.0               | 0.0               | 0.0               | 0.0               | 0.0               | 0.0                | 65.2               | 0.0                |
|       | 7202   | 600              | 550            | 13.1                             | 0.9             | 11.2            | 0.0               | 0.0               | 0.0               | 0.0               | 0.9               | 0.0               | 0.0                | 5.6                | 0.0                |
|       | 7203   | 550              | 500            | 29.3                             | 2.5             | 13.4            | 0.0               | 0.0               | 0.0               | 0.0               | 8.4               | 0.0               | 0.0                | 0.0                | 0.0                |
|       | 7204   | 500              | 475            | 25.9                             | 1.0             | 24.9            | 0.0               | 0.0               | 0.0               | 0.0               | 22.9              | 0.0               | 0.0                | 0.0                | 0.0                |
|       | 7205   | 475              | 450            | 22.1                             | 0.9             | 11.5            | 0.0               | 0.0               | 0.0               | 0.0               | 22.9              | 0.9               | 0.0                | 0.0                | 0.0                |
|       | 7206   | 450              | 425            | 44.0                             | 0.0             | 44.0            | 0.0               | 0.0               | 0.0               | 0.0               | 54.2              | 0.0               | 0.0                | 0.0                | 0.0                |
|       | 7207   | 425              | 400            | 16.3                             | 0.9             | 16.3            | 0.0               | 0.0               | 0.0               | 0.0               | 74.7              | 0.0               | 0.0                | 0.0                | 0.0                |
|       | 7208   | 400              | 350            | 3.8                              | 0.9             | 3.8             | 0.9               | 0.0               | 0.0               | 0.0               | 12.2              | 0.0               | 0.0                | 0.0                | 0.0                |
| 721   | 7211   | 350              | 300            | 0.9                              | 0.0             | 0.0             | 0.0               | 0.0               | 0.0               | 0.0               | 3.6               | 0.0               | 0.9                | 0.0                | 0.0                |
|       | 7212   | 300              | 250            | 0.0                              | 0.0             | 0.0             | 0.0               | 0.0               | 0.0               | 1.1               | 2.3               | 5.7               | 0.0                | 0.0                | 0.0                |
|       | 7213   | 250              | 200            | 0.0                              | 0.0             | 0.0             | 0.0               | 0.0               | 0.0               | 5.6               | 2.8               | 16.9              | 0.0                | 0.0                | 0.0                |
|       | 7214   | 200              | 150            | 0.0                              | 0.0             | 0.0             | 0.0               | 0.0               | 0.0               | 11.4              | 2.1               | 0.0               | 0.0                | 0.0                | 0.0                |
|       | 7215   | 150              | 125            | 0.0                              | 0.0             | 0.0             | 0.0               | 0.0               | 0.0               | 2.1               | 1.0               | 0.0               | 0.0                | 0.0                | 0.0                |
|       | 7216   | 125              | 100            | 0.0                              | 0.0             | 0.0             | 0.0               | 0.0               | 0.0               | 0.0               | 0.0               | 0.0               | 0.0                | 0.0                | 0.0                |
|       | 7217   | 100              | 75             | 0.0                              | 0.0             | 0.0             | 0.0               | 0.0               | 0.0               | 46.1              | 0.0               | 0.0               | 0.0                | 0.0                | 0.0                |
|       | 7218   | 75               | 50             | 0.0                              | 0.0             | 0.0             | 0.0               | 0.0               | 0.0               | 0.0               | 0.0               | 0.0               | 0.0                | 0.0                | 0.0                |
|       | 7219   | 50               | 0              | 0.0                              | 0.0             | 0.0             | 0.0               | 0.0               | 0.0               | 0.0               | 0.0               | 0.0               | 0.0                | 0.0                | 0.0                |
| 722   | 7221   | 350              | 300            | 0.0                              | 0.0             | 0.0             | 0.0               | 0.0               | 0.0               | 0.0               | 10.7              | 0.0               | 0.0                | 0.0                | 0.0                |
|       | 7222   | 300              | 250            | 2.9                              | 0.0             | 3.9             | 0.0               | 0.0               | 0.0               | 0.0               | 2.9               | 0.0               | 0.0                | 0.0                | 0.0                |
|       | 7223   | 250              | 200            | 10.4                             | 1.2             | 5.8             | 0.0               | 0.0               | 0.0               | 2.3               | 2.3               | 0.0               | 0.0                | 0.0                | 0.0                |
|       | 7224   | 200              | 150            | 7.0                              | 0.0             | 4.7             | 0.0               | 0.0               | 0.0               | 0.0               | 1.2               | 0.0               | 0.0                | 0.0                | 0.0                |
|       | 7225   | 150              | 125            | 5.1                              | 1.3             | 2.5             | 0.0               | 0.0               | 0.0               | 3.8               | 0.0               | 0.0               | 0.0                | 0.0                | 0.0                |
|       | 7226   | 125              | 100            | 0.0                              | 0.0             | 1.1             | 0.0               | 0.0               | 0.0               | 3.4               | 0.0               | 0.0               | 0.0                | 0.0                | 0.0                |
|       | 7227   | 100              | 75             | 0.0                              | 0.0             | 0.0             | 0.0               | 0.0               | 0.0               | 0.0               | 0.0               | 0.0               | 10.6               | 0.0                | 0.0                |
|       | 7228   | 75               | 50             | 0.0                              | 0.0             | 0.0             | 0.0               | 0.0               | 0.0               | 0.0               | 0.0               | 0.0               | 3.7                | 0.0                | 0.0                |
|       | 7229   | 50               | 0              | 0.0                              | 0.0             | 0.0             | 0.0               | 0.0               | 0.0               | 3.4               | 0.0               | 0.0               | 3.4                | 0.0                | 0.0                |
| 725   | 7251   | 1000             | 800            | 0.0                              | 0.0             | 0.0             | 0.0               | 1.2               | 4.6               | 0.0               | 0.8               | 1.7               | 0.0                | 2.1                | 0.0                |
|       | 7252   | 800              | 700            | 0.0                              | 0.0             | 0.0             | 0.0               | 0.0               | 0.0               | 0.0               | 0.0               | 1.2               | 0.0                | 21.6               | 0.0                |
|       | 7253   | 700              | 600            | 1.4                              | 0.0             | 0.0             | 0.0               | 0.0               | 0.0               | 0.0               | 0.7               | 0.0               | 0.0                | 38.7               | 0.0                |
|       | 7254   | 600              | 500            | 1.8                              | 0.0             | 0.9             | 0.0               | 0.9               | 0.0               | 0.9               | 0.9               | 0.0               | 0.0                | 81.9               | 0.0                |
|       | 7255   | 500              | 400            | 2.4                              | 0.0             | 0.0             | 0.0               | 1.2               | 0.0               | 0.0               | 0.0               | 22.4              | 0.0                | 0.0                | 0.0                |
|       | 7256   | 400              | 300            | 0.0                              | 0.0             | 0.0             | 0.0               | 0.0               | 0.0               | 0.9               | 0.0               | 0.0               | 0.0                | 0.0                | 0.0                |
|       | 7257   | 300              | 200            | 0.0                              | 0.0             | 2.3             | 0.0               | 0.0               | 0.0               | 6.8               | 1.1               | 0.0               | 0.0                | 0.0                | 0.0                |
|       | 7258   | 200              | 100            | 0.0                              | 0.0             | 0.0             | 0.0               | 0.0               | 0.0               | 5.5               | 0.0               | 0.0               | 1.8                | 0.0                | 0.0                |
|       | 7259   | 100              | 0              | 0.0                              | 0.0             | 0.0             | 0.0               | 0.0               | 1.7               | 1.7               | 0.0               | 0.9               | 6.0                | 9.5                | 0.0                |
| 727   | 7271   | 825              | 800            | 0.0                              | 0.0             | 0.0             | 0.0               | 2.2               | 5.5               | 0.0               | 1.1               | 1.1               | 0.0                | 12.1               | 0.0                |
|       | 7272   | 800              | 775            | 0.0                              | 0.0             | 0.0             | 0.0               | 2.7               | 8.9               | 0.0               | 0.9               | 0.0               | 0.0                | 1.8                | 0.0                |
|       | 7273   | 775              | 725            | 0.0                              | 0.0             | 0.0             | 2.2               | 2.2               | 1.5               | 0.0               | 0.0               | 0.7               | 0.0                | 2.9                | 0.0                |
|       | 7274   | 725              | 700            | 0.0                              | 0.0             | 0.0             | 0.0               | 0.0               | 0.0               | 0.0               | 1.2               | 1.2               | 0.0                | 4.9                | 0.0                |
|       | 7275   | 700              | 675            | 0.0                              | 0.0             | 0.0             | 0.0               | 1.2               | 0.0               | 0.0               | 1.2               | 0.0               | 0.0                | 18.3               | 0.0                |
|       | 7276   | 675              | 650            | 0.0                              | 0.0             | 0.0             | 0.0               | 0.0               | 0.0               | 0.0               | 3.7               | 0.0               | 0.0                | 11.2               | 0.0                |
|       | 7277   | 650              | 625            | 0.0                              | 0.0             | 0.0             | 1.0               | 0.0               | 0.0               | 0.0               | 0.0               | 4.1               | 1.0                | 15.2               | 0.0                |
|       | 7278   | 625              | 600            | 1.8                              | 0.0             | 0.9             | 0.9               | 1.8               | 0.0               | 0.0               | 1.8               | 3.6               | 0.0                | 14.3               | 0.0                |

Wishner Supplementary Table 1

| Tow # | Net ID | Start Depth<br>m | End Depth<br>m | Mec cla<br>Adults | Met bre<br>Adults | Met pri<br>Adults | Par cal<br>Adults | Ple Abd<br>Adults | Ple joh<br>Adults | Ple qua<br>Adults | Sca mag<br>Adults | Sub Sub<br>Adults |
|-------|--------|------------------|----------------|-------------------|-------------------|-------------------|-------------------|-------------------|-------------------|-------------------|-------------------|-------------------|
| 607   | 6071   | 1200             | 900            | ND                | ND                | ND                | ND                | 0.0               | 46.0              | 0.0               | ND                | 0.0               |
|       | 6072   | 900              | 750            | ND                | ND                | ND                | ND                | 0.0               | 1234.3            | 0.0               | ND                | 0.0               |
|       | 6073   | 750              | 550            | ND                | ND                | ND                | ND                | 0.0               | 0.0               | 0.0               | ND                | 0.0               |
|       | 6074   | 550              | 350            | ND                | ND                | ND                | ND                | 0.0               | 117.8             | 0.0               | ND                | 0.0               |
|       | 6075   | 350              | 150            | ND                | ND                | ND                | ND                | 0.0               | 366.9             | 0.0               | ND                | 0.0               |
|       | 6076   | 150              | 80             | ND                | ND                | ND                | ND                | 0.0               | 229.8             | 0.0               | ND                | 229.8             |
|       | 6077   | 80               | 20             | ND                | ND                | ND                | ND                | 0.0               | 0.0               | 0.0               | ND                | 1051.1            |
|       | 6078   | 20               | 0              | ND                | ND                | ND                | ND                | 0.0               | 0.0               | 0.0               | ND                | 1989.1            |
| 615   | 6151   | 550              | 502            | 0.0               | 172.7             | 0.0               | ND                | 0.0               | 0.0               | 0.0               | ND                | 0.0               |
|       | 6152   | 500              | 450            | 0.0               | 14.8              | 0.0               | ND                | 14.8              | 0.0               | 0.0               | ND                | 0.0               |
|       | 6153   | 450              | 400            | 0.0               | 15.8              | 0.0               | ND                | 0.0               | 0.0               | 0.0               | ND                | 0.0               |
|       | 6154   | 400              | 350            | 0.0               | 55.9              | 0.0               | ND                | 0.0               | 0.0               | 0.0               | ND                | 0.0               |
|       | 6155   | 350              | 300            | 0.0               | 1305.7            | 0.0               | ND                | 0.0               | 0.0               | 0.0               | ND                | 0.0               |
|       | 6156   | 300              | 250            | 0.0               | 8542.1            | 0.0               | ND                | 0.0               | 0.0               | 0.0               | ND                | 164.3             |
|       | 6157   | 250              | 200            | 0.0               | 1490.4            | 0.0               | ND                | 993.6             | 0.0               | 0.0               | ND                | 0.0               |
|       | 6158   | 200              | 150            | 0.0               | 0.0               | 0.0               | ND                | 691.3             | 0.0               | 0.0               | ND                | 0.0               |
| 616   | 6161   | 550              | 500            | 0.0               | 0.0               | 0.0               | ND                | 22.5              | 0.0               | 0.0               | ND                | 0.0               |
|       | 6162   | 500              | 450            | 0.0               | 0.0               | 0.0               | ND                | 0.0               | 0.0               | 0.0               | ND                | 48.5              |
|       | 6163   | 450              | 400            | 0.0               | 13.2              | 0.0               | ND                | 13.2              | 39.7              | 0.0               | ND                | 13.2              |
|       | 6164   | 400              | 350            | 0.0               | 228.0             | 0.0               | ND                | 10.9              | 10.9              | 0.0               | ND                | 10.9              |
|       | 6165   | 350              | 300            | 0.0               | 15958.4           | 0.0               | ND                | 664.9             | 0.0               | 0.0               | ND                | 0.0               |
|       | 6166   | 300              | 250            | 0.0               | 989.4             | 0.0               | ND                | 3250.9            | 0.0               | 0.0               | ND                | 141.3             |
|       | 6167   | 250              | 200            | 0.0               | 631.0             | 0.0               | ND                | 0.0               | 0.0               | 0.0               | ND                | 0.0               |
|       | 6168   | 200              | 150            | 0.0               | 372.7             | 0.0               | ND                | 372.7             | 0.0               | 0.0               | ND                | 0.0               |
| 617   | 6173   | 750              | 550            | 0.0               | 767.6             | 0.0               | ND                | 0.0               | 64.0              | 0.0               | ND                | 32.0              |
| 618   | 6181   | 150              | 100            | 0.0               | 0.0               | 0.0               | ND                | 0.0               | 0.0               | 0.0               | ND                | 21.9              |
|       | 6182   | 100              | 80             | 0.0               | 0.0               | 0.0               | ND                | 0.0               | 0.0               | 0.0               | ND                | 0.0               |
|       | 6183   | 80               | 60             | 0.0               | 0.0               | 0.0               | ND                | 0.0               | 0.0               | 0.0               | ND                | 0.0               |
|       | 6184   | 60               | 50             | 0.0               | 0.0               | 0.0               | ND                | 0.0               | 0.0               | 0.0               | ND                | 417.9             |
|       | 6185   | 50               | 40             | 0.0               | 0.0               | 0.0               | ND                | 0.0               | 0.0               | 0.0               | ND                | 593.4             |
|       | 6186   | 40               | 30             | 0.0               | 0.0               | 0.0               | ND                | 0.0               | 0.0               | 0.0               | ND                | 12695.7           |
|       | 6187   | 30               | 20             | 11215.8           | 0.0               | 0.0               | ND                | 0.0               | 0.0               | 0.0               | ND                | 33647.3           |
|       | 6188   | 20               | 0              | 0.0               | 0.0               | 0.0               | ND                | 0.0               | 0.0               | 0.0               | ND                | 5149.6            |
| 619   | 6191   | 1200             | 1100           | 0.0               | 161.6             | 6.2               | ND                | 0.0               | 0.0               | 0.0               | ND                | 12.4              |
|       | 6192   | 1100             | 1000           | 0.0               | 39.6              | 0.0               | ND                | 0.0               | 0.0               | 0.0               | ND                | 0.0               |
|       | 6193   | 1000             | 950            | 0.0               | 74.0              | 10.6              | ND                | 21.2              | 0.0               | 0.0               | ND                | 0.0               |
|       | 6194   | 950              | 900            | 0.0               | 116.7             | 16.7              | ND                | 0.0               | 0.0               | 0.0               | ND                | 16.7              |
|       | 6195   | 900              | 850            | 0.0               | 183.0             | 0.0               | ND                | 13.1              | 13.1              | 0.0               | ND                | 0.0               |
|       | 6196   | 850              | 800            | 0.0               | 383.5             | 0.0               | ND                | 91.3              | 0.0               | 0.0               | ND                | 36.5              |
|       | 6197   | 800              | 750            | 0.0               | 284.7             | 0.0               | ND                | 0.0               | 12.9              | 0.0               | ND                | 38.8              |
|       | 6198   | 750              | 700            | 0.0               | 174.3             | 0.0               | ND                | 0.0               | 0.0               | 0.0               | ND                | 0.0               |
| 621   | 6211   | 150              | 100            | 0.0               | 0.0               | 0.0               | ND                | 618.7             | 0.0               | 0.0               | ND                | 123.7             |
|       | 6212   | 100              | 80             | 0.0               | 0.0               | 0.0               | ND                | 174.9             | 0.0               | 0.0               | ND                | 0.0               |
|       | 6213   | 80               | 60             | 78.6              | 0.0               | 0.0               | ND                | 157.1             | 0.0               | 0.0               | ND                | 78.6              |
|       | 6214   | 60               | 50             | 0.0               | 0.0               | 0.0               | ND                | 1134.6            | 0.0               | 0.0               | ND                | 567.3             |
|       | 6215   | 50               | 40             | 0.0               | 0.0               | 0.0               | ND                | 606.2             | 0.0               | 0.0               | ND                | 1039.2            |
|       | 6216   | 40               | 30             | 8092.0            | 0.0               | 0.0               | ND                | 7356.3            | 0.0               | 0.0               | ND                | 4413.8            |
|       | 6217   | 30               | 20             | 4259.1            | 0.0               | 0.0               | ND                | 13385.6           | 0.0               | 0.0               | ND                | 8518.1            |
|       | 6218   | 20               | 0              | 0.0               | 0.0               | 0.0               | ND                | 0.0               | 0.0               |                   |                   | 21863.9           |
| 623   | 6231   | 775              | 733            | 0.0               | 115.8             | 0.0               | ND                | 0.0               | 0.0               | 0.0               | ND                | 46.3              |
|       | 6232   | 733              | 700            | 0.0               | 231.7             | 0.0               | ND                | 0.0               | 0.0               | 0.0               | ND                | 0.0               |
|       | 6233   | 700              | 675            | 0.0               | 242.9             | 48.6              | ND                | 0.0               | 0.0               | 0.0               | ND                | 97.2              |
|       | 6234   | 675              | 650            | 0.0               | 209.9             | 0.0               | ND                | 30.0              | 0.0               | 0.0               | ND                | 0.0               |
|       | 6235   | 650              | 625            | 0.0               | 183.9             | 0.0               | ND                | 0.0               | 0.0               | 0.0               | ND                | 0.0               |
|       | 6236   | 625              | 600            | 0.0               | 522.1             | 0.0               | ND                | 0.0               | 0.0               | 0.0               | ND                | 130.5             |
|       | 6237   | 600              | 575            | 223.2             | 111.6             | 0.0               | ND                | 0.0               | 0.0               | 0.0               | ND                | 0.0               |
|       | 6238   | 575              | 550            | 0.0               | 1346.1            | 0.0               | ND                | 0.0               | 0.0               | 0.0               | ND                | 0.0               |
| 626   | 6261   | 150              | 100            | 0.0               | 0.0               | 0.0               | ND                | 0.0               | 88.7              | 0.0               | ND                | 177.4             |
|       | 6262   | 100              | 80             | 0.0               | 0.0               | 0.0               | ND                | 0.0               | 0.0               | 0.0               | ND                | 0.0               |
|       | 6263   | 80               | 60             | 0.0               | 0.0               | 0.0               | ND                | 0.0               | 0.0               | 0.0               | ND                | 0.0               |
|       | 6264   | 60               | 50             | 0.0               | 0.0               | 0.0               | ND                | 0.0               | 0.0               | 0.0               | ND                | 33336.1           |
|       | 6265   | 50               | 40             | 15215.5           | 0.0               | 0.0               | ND                | 0.0               | 0.0               | 0.0               | ND                | 12679.5           |
|       | 6266   | 40               | 30             | 10098.6           | 0.0               | 0.0               | ND                | 0.0               | 0.0               | 0.0               | ND                | 1683.1            |
|       | 6267   | 30               | 20             | 0.0               | 0.0               | 0.0               | ND                | 0.0               | 0.0               | 0.0               | ND                | 0.0               |
|       | 6268   | 20               | 0              | 0.0               | 0.0               | 0.0               | ND                | 0.0               | 0.0               | 0.0               | ND                | 0.0               |
| 628   | 6281   | 550              | 500            | ND                | 0.0               |
|       | 6282   | 500              | 450            | ND                | 0.0               |
|       | 6283   | 450              | 400            | ND                | 27.0              |
|       | 6284   | 400              | 350            | ND                | ND                | ND                | ND                | 0.0               | 0.0               | 0.0               | ND                | 0.0               |

Wishner Supplementary Table 1

| Tow # | Net ID | Start Depth<br>m | End Depth<br>m | Mec cla<br>Adults | Met bre<br>Adults | Met pri<br>Adults | Par cal<br>Adults | Ple Abd<br>Adults | Ple joh<br>Adults | Ple qua<br>Adults | Sca mag<br>Adults | Sub Sub<br>Adults |
|-------|--------|------------------|----------------|-------------------|-------------------|-------------------|-------------------|-------------------|-------------------|-------------------|-------------------|-------------------|
|       | 6286   | 300              | 250            | ND                | ND                | ND                | ND                | 0.0               | 0.0               | 0.0               | ND                | 0.0               |
|       | 6287   | 250              | 200            | ND                | ND                | ND                | ND                | 0.0               | 0.0               | 0.0               | ND                | 0.0               |
|       | 6288   | 200              | 150            | 0.0               | 0.0               | 0.0               | ND                | 0.0               | 0.0               | 0.0               | ND                | 0.0               |
| 630   | 6301   | 550              | 500            | ND                | ND                | ND                | ND                | 0.0               | 113.8             | 0.0               | ND                | 22.8              |
|       | 6302   | 500              | 450            | ND                | ND                | ND                | ND                | 0.0               | 177.6             | 0.0               | ND                | 0.0               |
|       | 6303   | 450              | 400            | ND                | ND                | ND                | ND                | 0.0               | 349.6             | 0.0               | ND                | 0.0               |
|       | 6304   | 400              | 350            | ND                | ND                | ND                | ND                | 0.0               | 519.9             | 0.0               | ND                | 21.7              |
|       | 6305   | 350              | 300            | ND                | ND                | ND                | ND                | 0.0               | 1941.5            | 0.0               | ND                | 0.0               |
|       | 6306   | 300              | 250            | ND                | ND                | ND                | ND                | 0.0               | 3263.6            | 0.0               | ND                | 0.0               |
|       | 6307   | 250              | 200            | ND                | ND                | ND                | ND                | 0.0               | 167.6             | 0.0               | ND                | 0.0               |
|       | 6308   | 200              | 150            | 0.0               | 0.0               | 0.0               | ND                | 0.0               | 0.0               | 0.0               | ND                | 31.8              |
| 631   | 6311   | 1000             | 900            | 0.0               | 126.4             | 0.0               | 0.0               | 0.0               | 442.3             | 0.0               | ND                | 0.0               |
|       | 6312   | 900              | 875            | 0.0               | 25.7              | 0.0               | 0.0               | 0.0               | 231.0             | 0.0               | ND                | 0.0               |
|       | 6313   | 875              | 850            | 0.0               | 0.0               | 0.0               | 0.0               | 0.0               | 1654.0            | 0.0               | ND                | 0.0               |
|       | 6314   | 850              | 825            | 0.0               | 991.3             | 0.0               | ND                | 0.0               | 495.7             | 0.0               | ND                | 0.0               |
|       | 6315   | 825              | 800            | 0.0               | 780.6             | 0.0               | 0.0               | 0.0               | 0.0               | 0.0               | ND                | 0.0               |
|       | 6316   | 800              | 775            | 0.0               | 1962.2            | 0.0               | 0.0               | 0.0               | 0.0               | 0.0               | ND                | 0.0               |
|       | 6317   | 775              | 700            | 0.0               | 0.0               | 0.0               | 0.0               | 0.0               | 7.4               | 0.0               | ND                | 0.0               |
|       | 6318   | 700              | 550            | 8.0               | 8.0               | 0.0               | ND                | 0.0               | 0.0               | 0.0               | ND                | 8.0               |
| 632   | 6321   | 1000             | 900            | ND                | 12.6              |
|       | 6322   | 900              | 875            | ND                | 0.0               |
|       | 6323   | 875              | 850            | ND                | 0.0               |
|       | 6324   | 850              | 825            | ND                | 0.0               |
|       | 6325   | 825              | 800            | ND                | 0.0               |
|       | 6326   | 800              | 775            | ND                | 0.0               |
|       | 6327   | 775              | 700            | ND                | 0.0               |
|       | 6328   | 700              | 550            | ND                | 0.0               |
| 633   | 6331   | 150              | 100            | 0.0               | 0.0               | 0.0               | ND                | 0.0               | 0.0               | 0.0               | ND                | 341.6             |
|       | 6332   | 100              | 80             | 0.0               | 0.0               | 0.0               | ND                | 0.0               | 767.2             | 0.0               | ND                | 0.0               |
|       | 6333   | 80               | 60             | 0.0               | 0.0               | 0.0               | ND                | 0.0               | 1241.5            | 0.0               | ND                | 16760.4           |
|       | 6334   | 60               | 50             | 2507.3            | 0.0               | 0.0               | ND                | 0.0               | 20058.8           | 0.0               | ND                | 12536.7           |
|       | 6335   | 50               | 40             | 5325.9            | 0.0               | 0.0               | ND                | 0.0               | 3550.6            | 0.0               | ND                | 6657.4            |
|       | 6336   | 40               | 30             | 0.0               | 0.0               | 0.0               | ND                | 0.0               | 0.0               | 0.0               | ND                | 606.3             |
|       | 6337   | 30               | 20             | 0.0               | 0.0               | 0.0               | ND                | 0.0               | 360.6             | 0.0               | ND                | 1081.7            |
|       | 6338   | 20               | 0              | 0.0               | 0.0               | 0.0               | ND                | 0.0               | 0.0               | 0.0               | ND                | 0.0               |
| 635   | 6351   | 150              | 100            | ND                | 0.0               |
|       | 6352   | 100              | 80             | ND                | 115.8             |
|       | 6353   | 80               | 60             | ND                | 238.9             |
|       | 6354   | 60               | 50             | ND                | 191.3             |
|       | 6355   | 50               | 40             | ND                | 605.5             |
|       | 6356   | 40               | 30             | ND                | 380.0             |
|       | 6357   | 30               | 20             | ND                | 40407.3           |
|       | 6358   | 20               | 0              | ND                | 25754.5           |
| 636   | 6361   | 1000             | 900            | ND                | 44.9              |
|       | 6362   | 900              | 750            | ND                | 15.5              |
|       | 6363   | 750              | 650            | ND                | 0.0               |
|       | 6364   | 650              | 625            | ND                | 16.6              |
|       | 6365   | 625              | 600            | ND                | 163.0             |
|       | 6366   | 600              | 575            | ND                | 36.9              |
|       | 6367   | 575              | 550            | ND                | 130.6             |
|       | 6368   | 550              | 525            | ND                | 0.0               |
| 637   | 6371   | 550              | 500            | ND                | 0.0               |
|       | 6372   | 500              | 450            | ND                | 192.4             |
|       | 6373   | 450              | 400            | ND                | 105.8             |
|       | 6374   | 400              | 350            | ND                | 52.5              |
|       | 6375   | 350              | 300            | ND                | 0.0               |
|       | 6376   | 300              | 250            | ND                | 73.8              |
|       | 6377   | 250              | 200            | ND                | 40.8              |
|       | 6378   | 200              | 150            | ND                | 0.0               |
| 638   | 6381   | 150              | 100            | ND                | 66.1              |
|       | 6382   | 100              | 80             | ND                | 110.8             |
|       | 6383   | 80               | 60             | ND                | 97.1              |
|       | 6384   | 60               | 50             | ND                | 0.0               |
|       | 6385   | 50               | 40             | ND                | 1192.9            |
|       | 6386   | 40               | 30             | ND                | 7477.4            |
|       | 6387   | 30               | 20             | ND                | 44008.4           |
|       | 6388   | 20               | 0              | ND                | 759.0             |
| 640   | 6401   | 1000             | 900            | ND                | 31.9              |
|       | 6402   | 900              | 750            | ND                | 0.0               |

Wishner Supplementary Table 1

| Tow # | Net ID | Start Depth<br>m | End Depth<br>m | Mec cla<br>Adults | Met bre<br>Adults | Met pri<br>Adults | Par cal<br>Adults | Ple Abd<br>Adults | Ple joh<br>Adults | Ple qua<br>Adults | Sca mag<br>Adults | Sub Sub<br>Adults |
|-------|--------|------------------|----------------|-------------------|-------------------|-------------------|-------------------|-------------------|-------------------|-------------------|-------------------|-------------------|
|       | 6403   | 750              | 650            | ND                | 0.0               |
|       | 6404   | 650              | 625            | ND                | 0.0               |
|       | 6405   | 625              | 600            | ND                | 21.2              |
|       | 6406   | 600              | 575            | ND                | 812.2             |
|       | 6407   | 575              | 550            | ND                | 0.0               |
| 641   | 6413   | 500              | 450            | ND                | 22.1              |
|       | 6414   | 450              | 400            | ND                | 41.9              |
|       | 6415   | 400              | 350            | ND                | 9.9               |
|       | 6416   | 350              | 300            | ND                | 136.9             |
|       | 6417   | 300              | 250            | ND                | 0.0               |
|       | 6418   | 250              | 200            | ND                | 153.4             |
| 707   | 7071   | 450              | 400            | 0.0               | 26.8              | 0.0               | 0.0               | 0.0               | 0.0               | 3.8               | 7.7               | 0.0               |
|       | 7072   | 400              | 350            | 0.0               | 6.0               | 1.7               | 4.3               | 1.7               | 0.0               | 0.0               | 0.0               | 0.0               |
|       | 7073   | 350              | 300            | 0.0               | 0.0               | 8.1               | 6.5               | 6.5               | 0.0               | 0.0               | 0.0               | 0.0               |
|       | 7074   | 300              | 250            | 0.0               | 0.0               | 3.1               | 0.0               | 0.0               | 0.0               | 0.0               | 2.1               | 0.0               |
|       | 7075   | 250              | 200            | 0.0               | 0.0               | 0.0               | 0.0               | 4.7               | 0.0               | 3.7               | 3.7               | 0.0               |
|       | 7076   | 200              | 150            | 0.0               | 0.0               | 0.0               | 0.0               | 0.0               | 0.0               | 2.2               | 2.2               | 0.0               |
|       | 7077   | 150              | 100            | 0.0               | 0.0               | 0.0               | 0.0               | 31.0              | 0.0               | 201.3             | 0.0               | 0.0               |
|       | 7078   | 100              | 0              | 48.0              | 0.0               | 0.0               | 0.0               | 0.0               | 0.0               | 24.0              | 0.0               | 0.0               |
| 708   | 7081   | 450              | 400            | 0.0               | 0.0               | 3.8               | 3.8               | 0.0               | 0.0               | 2.5               | 5.0               | 0.0               |
|       | 7082   | 400              | 350            | 0.0               | 2.8               | 0.0               | 0.0               | 17.1              | 0.0               | 2.8               | 0.0               | 0.0               |
|       | 7083   | 350              | 300            | 0.0               | 1.8               | 0.0               | 0.0               | 27.3              | 0.0               | 38.3              | 0.0               | 0.0               |
|       | 7084   | 300              | 250            | 0.0               | 0.0               | 0.0               | 0.0               | 80.2              | 0.0               | 17.8              | 0.0               | 0.0               |
|       | 7085   | 250              | 200            | 0.0               | 0.0               | 0.0               | 0.0               | 0.0               | 0.0               | 0.0               | 0.0               | 0.0               |
|       | 7086   | 200              | 150            | 0.7               | 0.0               | 0.0               | 0.0               | 0.0               | 0.0               | 0.0               | 0.0               | 0.0               |
|       | 7087   | 150              | 100            | 0.0               | 0.0               | 0.0               | 0.0               | 0.8               | 0.0               | 0.0               | 0.0               | 0.0               |
|       | 7088   | 100              | 0              | 144.8             | 0.0               | 0.0               | 0.0               | 0.0               | 0.0               | 0.8               | 0.0               | 24.1              |
| 709   | 7091   | 1000             | 850            | 0.0               | 0.0               | 0.4               | 0.0               | 0.0               | 0.0               | 0.4               | 0.0               | 0.0               |
|       | 7092   | 850              | 800            | 0.0               | 0.0               | 0.0               | 0.0               | 0.0               | 0.0               | 0.8               | 0.0               | 0.0               |
|       | 7093   | 800              | 750            | 0.0               | 0.0               | 2.5               | 1.0               | 0.0               | 0.0               | 2.0               | 0.0               | 0.0               |
|       | 7094   | 750              | 700            | 0.0               | 0.0               | 0.9               | 5.6               | 0.0               | 0.0               | 0.0               | 0.0               | 0.0               |
|       | 7095   | 700              | 650            | 0.0               | 0.0               | 3.6               | 1.3               | 0.0               | 0.0               | 0.0               | 0.0               | 0.0               |
|       | 7096   | 650              | 600            | 0.0               | 0.6               | 1.9               | 0.0               | 0.0               | 0.0               | 0.0               | 3.2               | 0.0               |
|       | 7097   | 600              | 550            | 0.0               | 1.2               | 1.2               | 0.0               | 0.0               | 0.0               | 0.6               | 3.0               | 0.0               |
|       | 7098   | 550              | 450            | 0.0               | 5.9               | 0.0               | 0.0               | 0.0               | 0.0               | 0.0               | 0.0               | 0.0               |
| 710   | 7101   | 1000             | 850            | 0.0               | 0.0               | 0.3               | 0.0               | 0.3               | 0.0               | 0.0               | 0.3               | 0.0               |
|       | 7102   | 850              | 800            | 0.0               | 0.0               | 2.1               | 1.5               | 0.0               | 0.0               | 3.6               | 1.0               | 0.0               |
|       | 7103   | 800              | 750            | 0.0               | 0.0               | 2.0               | 1.0               | 0.0               | 0.0               | 1.0               | 0.0               | 0.0               |
|       | 7104   | 750              | 700            | 0.0               | 0.6               | 3.5               | 2.3               | 0.0               | 0.0               | 2.9               | 0.0               | 0.0               |
|       | 7105   | 700              | 650            | 0.0               | 0.0               | 4.5               | 1.8               | 0.0               | 0.0               | 3.6               | 0.0               | 0.0               |
|       | 7106   | 650              | 600            | 0.0               | 0.0               | 1.3               | 0.0               | 0.0               | 0.0               | 0.0               | 1.3               | 0.0               |
|       | 7107   | 600              | 550            | 0.0               | 3.1               | 0.0               | 0.0               | 0.0               | 0.0               | 0.0               | 3.1               | 0.0               |
|       | 7108   | 550              | 450            | 0.0               | 2.1               | 4.2               | 0.0               | 2.1               | 0.0               | 0.0               | 6.4               | 0.0               |
| 711   | 7111   | 468              | 460            | 0.0               | 0.0               | 13.1              | 2.0               | 2.0               | 0.0               | 0.0               | 0.0               | 0.0               |
|       | 7112   | 460              | 463            | 0.0               | 7.2               | 7.2               | 3.6               | 3.6               | 0.0               | 0.0               | 14.5              | 0.0               |
|       | 7113   | 463              | 384            |                   |                   |                   |                   |                   |                   |                   |                   |                   |
|       | 7114   | 384              | 390            | 0.0               | 1.1               | 0.0               | 0.0               | 0.0               | 0.0               | 0.0               | 0.0               | 0.0               |
|       | 7115   | 390              | 390            | 0.0               | 2.2               | 0.0               | 0.0               | 0.0               | 0.0               | 0.0               | 0.0               | 0.0               |
|       | 7116   | 390              | 367            |                   |                   |                   |                   |                   |                   |                   |                   |                   |
|       | 7117   | 367              | 385            | 0.0               | 10.5              | 0.0               | 0.0               | 1.1               | 0.0               | 0.0               | 0.0               | 0.0               |
|       | 7118   | 385              | 348            | 0.0               | 4.9               | 0.0               | 0.0               | 4.9               | 0.0               | 1.0               | 0.0               | 0.0               |
| 713   | 7131   | 800              | 775            | 0.0               | 0.0               | 0.0               | 0.0               | 0.0               | 0.0               | 0.0               | 0.0               | 0.0               |
|       | 7132   | 775              | 750            | 0.0               | 0.0               | 3.9               | 1.0               | 0.0               | 0.0               | 1.0               | 0.0               | 0.0               |
|       | 7133   | 750              | 725            | 0.0               | 0.0               | 1.7               | 1.7               | 0.0               | 0.0               | 0.0               | 0.0               | 0.0               |
|       | 7134   | 725              | 700            | 0.0               | 0.0               | 1.8               | 1.8               | 0.6               | 0.0               | 0.0               | 0.6               | 0.0               |
|       | 7135   | 700              | 675            | 0.0               | 0.0               | 2.7               | 2.7               | 0.9               | 0.0               | 0.9               | 0.9               | 0.0               |
|       | 7136   | 675              | 650            | 0.0               | 0.0               | 3.8               | 1.9               | 0.0               | 0.0               | 0.0               | 2.9               | 0.0               |
|       | 7137   | 650              | 625            | 0.0               | 0.0               | 2.9               | 1.0               | 0.0               | 0.0               | 0.0               | 1.0               | 0.0               |
|       | 7138   | 625              | 600            | 0.0               | 0.0               | 0.0               | 0.0               | 0.0               | 0.0               | 0.0               | 2.6               | 0.0               |
| 716   | 7161   | 1000             | 800            | 0.0               | 0.0               | 1.1               | 0.8               | 0.0               | 0.0               | 0.4               | 0.0               | 0.0               |
|       | 7162   | 800              | 700            | 0.0               | 0.0               | 3.3               | 1.1               | 0.0               | 1.1               | 3.3               | 7.7               | 0.0               |
|       | 7163   | 700              | 600            | 0.0               | 0.0               | 0.9               | 0.0               | 0.9               | 0.0               | 0.0               | 4.7               | 0.0               |
|       | 7164   | 600              | 500            | 0.0               | 4.2               | 0.0               | 0.0               | 0.0               | 0.0               | 0.0               | 2.1               | 0.0               |
|       | 7165   | 500              | 400            | 0.0               | 3.0               | 0.0               | 0.0               | 0.0               | 0.0               | 9.1               | 4.0               | 0.0               |
|       | 7166   | 400              | 300            | 0.0               | 3.6               | 3.6               | 0.0               | 0.0               | 0.0               | 6.0               | 0.0               | 0.0               |
|       | 7167   | 300              | 200            | 0.0               | 0.0               | 0.0               | 0.0               | 0.0               | 1.3               | 2.6               | 7.7               | 0.0               |
|       | 7168   | 200              | 100            | 1.9               | 0.0               | 0.0               | 0.0               | 5.8               | 0.0               | 33.6              | 1.9               | 1.0               |
|       | 7169   | 100              | 0              | 0.0               | 0.0               | 0.0               | 0.0               | 64.9              | 0.0               | 0.0               | 0.0               | 0.0               |
| 718   | 7181   | 650              | 600            | 0.0               | 0.0               | 0.0               | 0.0               | 0.0               | 0.8               | 5.5               | 0.8               | 0.0               |
|       | 7182   | 600              | 550            | 0.0               | 0.0               | 0.0               | 0.0               | 0.8               | 0.0               | 9.8               | 5.3               | 0.0               |
|       | 7183   | 550              | 500            | 0.0               | 3.0               | 0.0               | 0.7               | 0.0               | 0.0               | 2.2               | 9.6               | 0.0               |

| Tow # | Net ID | Start Depth<br>m | End Depth<br>m | Mec cla<br>Adults | Met bre<br>Adults | Met pri<br>Adults | Par cal<br>Adults | Ple Abd<br>Adults | Ple joh<br>Adults | Ple qua<br>Adults | Sca mag<br>Adults | Sub Sub<br>Adults |
|-------|--------|------------------|----------------|-------------------|-------------------|-------------------|-------------------|-------------------|-------------------|-------------------|-------------------|-------------------|
|       | 7184   | 500              | 475            | 0.0               | 2.7               | 3.7               | 0.0               | 0.0               | 0.0               | 3.7               | 17.4              | 0.0               |
|       | 7185   | 475              | 450            | 0.0               | 0.9               | 0.9               | 0.9               | 0.9               | 0.0               | 8.0               | 8.0               | 0.0               |
|       | 7186   | 450              | 425            | 0.0               | 0.9               | 0.9               | 0.9               | 0.9               | 0.0               | 24.4              | 14.8              | 0.0               |
|       | 7187   | 425              | 400            | 0.0               | 0.9               | 4.4               | 0.0               | 0.9               | 0.0               | 33.1              | 11.3              | 0.0               |
|       | 7188   | 400              | 350            | 0.0               | 0.0               | 0.7               | 0.0               | 0.7               | 0.7               | 68.3              | 0.0               | 0.0               |
| 719   | 7191   | 650              | 600            | 0.0               | 0.0               | 0.0               | 0.0               | 0.0               | 0.0               | 0.0               | 3.0               | 0.0               |
|       | 7192   | 600              | 550            | 0.0               | 0.9               | 0.0               | 0.0               | 0.0               | 0.0               | 0.9               | 6.4               | 0.0               |
|       | 7193   | 550              | 500            | 0.0               | 0.8               | 0.0               | 0.0               | 0.0               | 0.0               | 0.8               | 0.0               | 0.0               |
|       | 7194   | 500              | 475            | 0.0               | 0.0               | 0.0               | 0.0               | 0.0               | 0.0               | 2.5               | 0.8               | 0.0               |
|       | 7195   | 475              | 450            | 0.0               | 0.0               | 0.0               | 0.0               | 0.9               | 3.7               | 0.9               | 0.0               | 0.0               |
|       | 7196   | 450              | 425            | 0.0               | 3.1               | 2.1               | 0.0               | 0.0               | 41.4              | 2.1               | 11.4              | 0.0               |
|       | 7197   | 425              | 400            | 0.0               | 0.0               | 0.9               | 0.9               | 1.8               | 6.3               | 20.6              | 0.0               | 0.0               |
|       | 7198   | 400              | 350            | 0.0               | 0.8               | 0.0               | 0.0               | 15.8              | 0.0               | 19.5              | 0.0               | 0.0               |
| 720   | 7201   | 650              | 600            | 0.0               | 0.0               | 0.0               | 0.0               | 0.0               | 0.0               | 1.2               | 2.4               | 0.0               |
|       | 7202   | 600              | 550            | 0.0               | 0.9               | 0.0               | 0.0               | 0.0               | 0.0               | 0.0               | 0.0               | 0.0               |
|       | 7203   | 550              | 500            | 0.0               | 0.0               | 0.0               | 0.0               | 0.0               | 0.0               | 0.0               | 0.0               | 0.0               |
|       | 7204   | 500              | 475            | 0.0               | 1.0               | 0.0               | 0.0               | 0.0               | 0.0               | 0.0               | 0.0               | 0.0               |
|       | 7205   | 475              | 450            | 0.0               | 3.5               | 0.0               | 0.0               | 0.0               | 0.0               | 0.0               | 0.0               | 0.0               |
|       | 7206   | 450              | 425            | 0.0               | 1.1               | 0.0               | 0.0               | 0.0               | 0.0               | 0.0               | 0.0               | 0.0               |
|       | 7207   | 425              | 400            | 0.0               | 1.7               | 0.0               | 0.0               | 0.0               | 0.0               | 0.9               | 0.0               | 0.0               |
|       | 7208   | 400              | 350            | 0.0               | 4.7               | 0.0               | 0.0               | 0.0               | 0.0               | 0.0               | 0.0               | 0.0               |
| 721   | 7211   | 350              | 300            | 0.0               | 0.9               | 0.0               | 0.0               | 9.0               | 3.6               | 38.5              | 1.8               | 0.0               |
|       | 7212   | 300              | 250            | 0.0               | 0.0               | 0.0               | 0.0               | 1.1               | 0.0               | 1.1               | 4.6               | 0.0               |
|       | 7213   | 250              | 200            | 0.0               | 0.0               | 0.0               | 0.0               | 5.6               | 0.0               | 4.2               | 4.2               | 0.0               |
|       | 7214   | 200              | 150            | 0.0               | 0.0               | 0.0               | 0.0               | 8.3               | 0.0               | 21.7              | 0.0               | 1.0               |
|       | 7215   | 150              | 125            | 0.0               | 0.0               | 0.0               | 0.0               | 6.2               | 0.0               | 16.6              | 0.0               | 0.0               |
|       | 7216   | 125              | 100            | 0.0               | 0.0               | 0.0               | 0.0               | 14.3              | 1.0               | 1.0               | 0.0               | 0.0               |
|       | 7217   | 100              | 75             | 15.4              | 0.0               | 0.0               | 0.0               | 138.2             | 30.7              | 0.0               | 0.0               | 15.4              |
|       | 7218   | 75               | 50             | 15.9              | 0.0               | 0.0               | 0.0               | 382.1             | 0.0               | 0.0               | 0.0               | 0.0               |
|       | 7219   | 50               | 0              | 12.4              | 0.0               | 0.0               | 0.0               | 223.8             | 0.0               | 12.4              | 0.0               | 0.0               |
| 722   | 7221   | 350              | 300            | 0.0               | 0.0               | 0.0               | 0.0               | 288.2             | 0.0               | 202.8             | 0.0               | 0.0               |
|       | 7222   | 300              | 250            | 1.0               | 0.0               | 0.0               | 0.0               | 11.8              | 0.0               | 1.0               | 0.0               | 0.0               |
|       | 7223   | 250              | 200            | 0.0               | 0.0               | 0.0               | 0.0               | 0.0               | 0.0               | 0.0               | 0.0               | 0.0               |
|       | 7224   | 200              | 150            | 0.0               | 0.0               | 0.0               | 0.0               | 1.2               | 0.0               | 0.0               | 0.0               | 0.0               |
|       | 7225   | 150              | 125            | 0.0               | 0.0               | 0.0               | 0.0               | 0.0               | 0.0               | 0.0               | 0.0               | 1.3               |
|       | 7226   | 125              | 100            | 3.4               | 0.0               | 0.0               | 0.0               | 0.0               | 0.0               | 0.0               | 0.0               | 1.1               |
|       | 7227   | 100              | 75             | 10.6              | 0.0               | 0.0               | 0.0               | 0.0               | 0.0               | 0.0               | 0.0               | 5.3               |
|       | 7228   | 75               | 50             | 0.0               | 0.0               | 0.0               | 0.0               | 0.0               | 0.0               | 3.7               | 0.0               | 0.0               |
|       | 7229   | 50               | 0              | 10.2              | 0.0               | 0.0               | 0.0               | 3.4               | 0.0               | 17.1              | 0.0               | 0.0               |
| 725   | 7251   | 1000             | 800            | 0.0               | 0.0               | 6.2               | 0.4               | 0.0               | 0.4               | 3.7               | 0.4               | 0.0               |
|       | 7252   | 800              | 700            | 0.0               | 0.0               | 6.0               | 0.6               | 0.0               | 0.0               | 3.6               | 7.2               | 0.0               |
|       | 7253   | 700              | 600            | 0.0               | 0.0               | 0.0               | 0.0               | 0.0               | 0.0               | 3.4               | 4.1               | 0.0               |
|       | 7254   | 600              | 500            | 0.0               | 1.8               | 3.7               | 0.0               | 0.9               | 0.9               | 1.8               | 12.9              | 0.0               |
|       | 7255   | 500              | 400            | 0.0               | 0.0               | 17.6              | 1.2               | 2.4               | 11.8              | 20.0              | 12.9              | 0.0               |
|       | 7256   | 400              | 300            | 0.0               | 0.0               | 0.0               | 0.0               | 15.2              | 0.0               | 46.3              | 0.0               | 0.0               |
|       | 7257   | 300              | 200            | 0.0               | 0.0               | 0.0               | 0.0               | 4.5               | 0.0               | 0.0               | 0.0               | 0.0               |
|       | 7258   | 200              | 100            | 0.9               | 0.0               | 0.0               | 0.0               | 0.0               | 0.0               | 0.0               | 0.0               | 1.8               |
|       | 7259   | 100              | 0              | 0.9               | 0.0               | 0.9               | 0.9               | 1.7               | 0.9               | 6.9               | 1.7               | 0.9               |
| 727   | 7271   | 825              | 800            | 0.0               | 0.0               | 0.0               | 3.3               | 3.3               | 2.2               | 26.3              | 3.3               | 0.0               |
|       | 7272   | 800              | 775            | 0.0               | 0.0               | 2.7               | 0.0               | 2.7               | 4.5               | 12.5              | 2.7               | 0.0               |
|       | 7273   | 775              | 725            | 0.0               | 0.0               | 2.2               | 0.7               | 4.4               | 1.5               | 12.4              | 2.2               | 0.0               |
|       | 7274   | 725              | 700            | 0.0               | 0.0               | 4.9               | 4.9               | 27.9              | 10.9              | 20.6              | 0.0               | 0.0               |
|       | 7275   | 700              | 675            | 0.0               | 0.0               | 9.8               | 1.2               | 15.9              | 3.7               | 28.1              | 4.9               | 0.0               |
|       | 7276   | 675              | 650            | 0.0               | 0.0               | 0.0               | 1.9               | 11.2              | 5.6               | 18.7              | 5.6               | 0.0               |
|       | 7277   | 650              | 625            | 0.0               | 0.0               | 6.1               | 0.0               | 6.1               | 10.2              | 20.3              | 16.3              | 0.0               |
|       | 7278   | 625              | 600            | 0.0               | 0.0               | 9.0               | 0.9               | 2.7               | 6.3               | 9.9               | 17.9              | 0.0               |
